# Supplementary material for: A DFT study on PBu3-catalyzed intramolecular cyclizations of N-allylic substituted α-amino nitriles for the formation of functionalized pyrrolidines: mechanisms, selectivities, and the role of catalysts
Source: Royal Society of Chemistry journal article supplement (doi:10.1039/c6ob00150e), 2016-01-01
Supplement: c6ob00150e1.pdf [file c6ob00150e1.pdf]

**SUPPORTING MATERIAL FOR**  
**A DFT study on the PBU<sub>3</sub>-catalyzed intramolecular cyclizations of N-allylic substituted  $\alpha$ -amino nitriles for the formation of functionalized pyrrolidines: mechanisms, selectivities, and role of catalyst**

Linjie Zheng,<sup>a</sup> Mingsheng Tang,<sup>a</sup> Yang Wang,<sup>a</sup> Xiaokang Guo,<sup>a</sup> Donghui Wei,<sup>\*,a</sup> and Yan Qiao<sup>\*,b</sup>

<sup>a</sup> The College of Chemistry and Molecular Engineering, Center of Computational Chemistry, Zhengzhou University, Zhengzhou, Henan Province, 450001, P.R. China

<sup>b</sup> School of Basic Medical Sciences, Zhengzhou University, Zhengzhou, Henan 450001, P.R. China

**Table of Contents**

|                                                                                                    |         |
|----------------------------------------------------------------------------------------------------|---------|
| 1. The single-point energies and the Gibbs free energy corrections of all the optimized structures | Page S2 |
| 2. The relative Gibbs free energies for different conformations                                    | Page S3 |
| 3. The optimized structures of transition states                                                   | Page S4 |
| 4. Coordinates of stationary points (SP)                                                           | Page S5 |

**Table S1.** The single-point energies (SPE) calculated at the M06-2X/6-31+G(d, p) level and

---

\* Corresponding Authors: [donghuiwei@zzu.edu.cn](mailto:donghuiwei@zzu.edu.cn) (D. H. Wei) and [yanqiao@zzu.edu.cn](mailto:yanqiao@zzu.edu.cn) (Y. Qiao)

the Gibbs free energy corrections (GFEC) calculated by the THERMO program of all the optimized structures (OS) (unit: a.u.)

| OS                   | SPE          | GFEC     | OS             | SPE          | GFEC     |
|----------------------|--------------|----------|----------------|--------------|----------|
| <b>cat</b>           | -814.645590  | 0.329107 | <b>P(RS)</b>   | -994.458042  | 0.290337 |
| <b>React-(R)+Cat</b> | -994.408557  | 0.286110 | <b>P(RR)</b>   | -994.459111  | 0.289012 |
| <b>React-(S)+Cat</b> | -994.408557  | 0.286110 | <b>M2(SS)</b>  | -1809.079933 | 0.647644 |
| <b>TS1(R)</b>        | -1809.062209 | 0.640028 | <b>M2(SR)</b>  | -1809.076817 | 0.644514 |
| <b>M1(R)</b>         | -1809.080139 | 0.641879 | <b>TS3(SS)</b> | -1809.040144 | 0.642345 |
| <b>TS2(RS)</b>       | -1809.059768 | 0.638456 | <b>TS3(SR)</b> | -1809.032910 | 0.641888 |
| <b>TS2(RR)</b>       | -1809.063291 | 0.638546 | <b>P(SS)</b>   | -994.459111  | 0.289012 |
| <b>TS2(R)</b>        | -1809.015841 | 0.638813 | <b>P(SR)</b>   | -994.458042  | 0.290337 |
| <b>M2(RS)</b>        | -1809.076817 | 0.644514 | <b>TS1(S)</b>  | -1809.061740 | 0.641243 |
| <b>M2(RR)</b>        | -1809.079933 | 0.647644 | <b>M1(S)</b>   | -1809.080139 | 0.641879 |
| <b>TS3(RS)</b>       | -1809.040136 | 0.641394 | <b>TS2(SS)</b> | -1809.065425 | 0.638936 |
| <b>TS3(RR)</b>       | -1809.035895 | 0.641974 | <b>TS2(SR)</b> | -1809.063837 | 0.639824 |
| <b>R-TS1</b>         | -1809.056011 | 0.644361 | <b>TS2(S)</b>  | -1809.016257 | 0.639289 |
| <b>R-TS2</b>         | -1809.052232 | 0.645725 |                |              |          |

**Table S2.** The relative Gibbs free energies of **TS3(RR&SR&RS&SS)** and **TS3'(RR&SR&RS&SS)**

with the energy of **React-(R&S)+Cat** as 0.0 kcal/mol (unit: kcal/mol)

| <b>SP</b>       | <b>Energ</b> |
|-----------------|--------------|
|                 | y            |
| <b>TS3(RR)</b>  | 28.2         |
| <b>TS3(SR)</b>  | 30.1         |
| <b>TS3(RS)</b>  | 25.2         |
| <b>TS3(SS)</b>  | 25.8         |
| <b>TS3'(RR)</b> | 28.6         |
| <b>TS3'(SR)</b> | 30.8         |
| <b>TS3'(RS)</b> | 26.1         |
| <b>TS3'(SS)</b> | 26.5         |

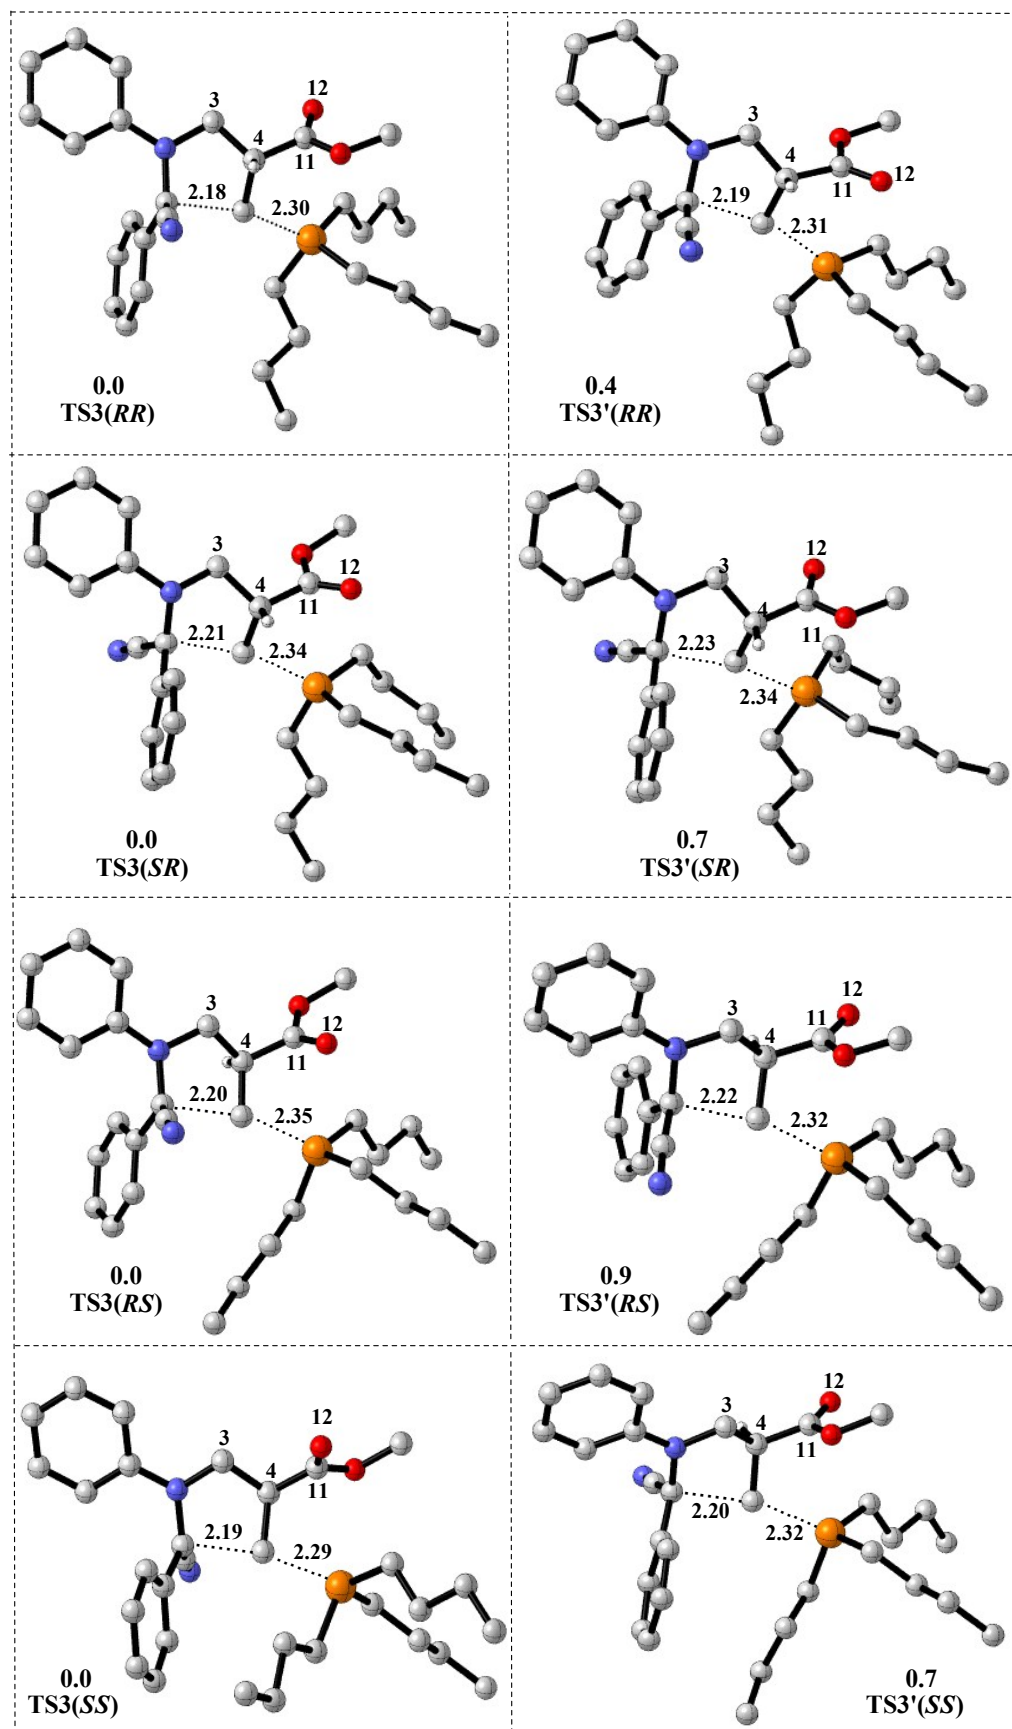

Fig. S1 The optimized structures of transition states  $TS3(RR&SR&RS&SS)$  and  $TS3'(RR&SR&RS&SS)$

Coordinates of stationary points (SP) of PBU<sub>3</sub>-catalyzed intramolecular cyclizations of N-allylic substituted  $\alpha$ -amino nitriles in MeCN solvent

| Cat |             |             |             |  |
|-----|-------------|-------------|-------------|--|
| P   | 0.00026600  | -0.00172200 | -2.12975500 |  |
| C   | -1.12866800 | -1.27364400 | -1.35677400 |  |
| C   | -1.66860200 | -1.08354700 | 0.06172300  |  |
| H   | -1.97998900 | -1.36035300 | -2.04327800 |  |
| H   | -0.59399900 | -2.23039400 | -1.43253400 |  |
| C   | -2.60876600 | -2.21748100 | 0.47306500  |  |
| H   | -2.21140400 | -0.13113000 | 0.12484700  |  |
| H   | -0.84705500 | -1.02199800 | 0.78384500  |  |
| C   | -3.17236800 | -2.02592200 | 1.87840800  |  |
| H   | -2.06747700 | -3.17040700 | 0.41625200  |  |
| H   | -3.43014100 | -2.28522700 | -0.25137500 |  |
| H   | -3.83991200 | -2.84477600 | 2.15923500  |  |
| H   | -3.73863100 | -1.09157200 | 1.94637700  |  |
| H   | -2.36659500 | -1.98017200 | 2.61794600  |  |
| C   | -0.53610700 | 1.61314600  | -1.35937700 |  |
| C   | -0.10516100 | 1.98471600  | 0.06070900  |  |
| H   | -0.18115500 | 2.39266500  | -2.04514500 |  |
| H   | -1.63173600 | 1.63164500  | -1.43838700 |  |
| C   | -0.61528600 | 3.36734300  | 0.46980800  |  |
| H   | 0.99093900  | 1.97613100  | 0.12805100  |  |
| H   | -0.46746900 | 1.24342300  | 0.78144700  |  |
| C   | -0.17632000 | 3.75703600  | 1.87871200  |  |
| H   | -1.71072900 | 3.37876100  | 0.40541700  |  |
| H   | -0.25561800 | 4.11180500  | -0.25153800 |  |
| H   | -0.54868600 | 4.74649200  | 2.15679800  |  |
| H   | 0.91553700  | 3.77483300  | 1.95529200  |  |
| H   | -0.54903800 | 3.03817800  | 2.61526400  |  |
| C   | 1.66640900  | -0.34203700 | -1.35670800 |  |
| C   | 1.77300300  | -0.90415300 | 0.06228400  |  |
| H   | 2.16846500  | -1.03530000 | -2.04301400 |  |
| H   | 2.22662500  | 0.59997900  | -1.43205500 |  |
| C   | 3.22612700  | -1.14622300 | 0.47337900  |  |
| H   | 1.22329800  | -1.85250600 | 0.12649500  |  |
| H   | 1.30702800  | -0.22429500 | 0.78414700  |  |
| C   | 3.34515800  | -1.72708500 | 1.87972800  |  |
| H   | 3.77766700  | -0.19934800 | 0.41440500  |  |
| H   | 3.69705600  | -1.82349400 | -0.25022000 |  |
| H   | 4.38894700  | -1.89164400 | 2.15978200  |  |
| H   | 2.82241700  | -2.68626400 | 1.95019400  |  |
| H   | 2.90112900  | -1.05210300 | 2.61834400  |  |

React-(R)

|   |             |             |             |
|---|-------------|-------------|-------------|
| C | -0.55438700 | -0.96121300 | 0.73689400  |
| C | -0.71569900 | -0.85602000 | 2.21696900  |
| C | 1.84024200  | -1.29704400 | -1.65699900 |
| C | 2.37958600  | -0.85266400 | -0.52398500 |
| C | 1.65368000  | 0.01986700  | 0.48218400  |
| N | 0.22648900  | 0.13622700  | 0.20582900  |
| H | 2.39925000  | -1.94668800 | -2.32151100 |
| H | 1.81192900  | -0.39602500 | 1.49033800  |
| H | 2.08268600  | 1.02317400  | 0.51143500  |
| N | -0.79520900 | -0.75736700 | 3.36608700  |
| H | 0.83095200  | -1.01630100 | -1.93860200 |
| C | -0.32945300 | 1.43638900  | 0.12941700  |
| C | 0.32187300  | 2.38866400  | -0.66818200 |
| C | -1.51677600 | 1.79593500  | 0.77676300  |
| C | -0.18392900 | 3.67683000  | -0.78606600 |
| H | 1.21613500  | 2.10360400  | -1.21561900 |
| C | -2.02359000 | 3.08687300  | 0.63864800  |
| H | -2.05664300 | 1.08160700  | 1.38775200  |
| C | -1.36186000 | 4.03626600  | -0.13264100 |
| H | 0.33789900  | 4.39722500  | -1.40781700 |
| H | -2.94456700 | 3.34668900  | 1.15070000  |
| H | -1.76148700 | 5.03956900  | -0.23175100 |
| C | -1.88933000 | -1.19319300 | 0.03403700  |
| C | -2.91810700 | -1.87544300 | 0.68414400  |
| C | -2.06113800 | -0.78785500 | -1.28978600 |
| C | -4.10723500 | -2.15329300 | 0.01477300  |
| H | -2.79525600 | -2.19106100 | 1.71648600  |
| C | -3.25177900 | -1.06576100 | -1.95569700 |
| H | -1.27347800 | -0.23693800 | -1.79297000 |
| C | -4.27725900 | -1.74935000 | -1.30674100 |
| H | -4.90133800 | -2.68287400 | 0.53054700  |
| H | -3.37800000 | -0.74060100 | -2.98314500 |
| H | -5.20547800 | -1.96183400 | -1.82670100 |
| C | 3.76106100  | -1.32446000 | -0.15840600 |
| O | 4.05072100  | -2.49531500 | -0.09988700 |
| O | 4.69489200  | -0.40982100 | 0.14876300  |
| C | 4.55971600  | 0.96070600  | -0.23995800 |
| H | 3.85627800  | 1.07372400  | -1.06779900 |
| H | 4.24376900  | 1.56061800  | 0.61572500  |
| H | 5.54732900  | 1.28730400  | -0.56350500 |
| H | 0.05244300  | -1.86352900 | 0.57981900  |

TS1 (R)

|   |              |              |              |
|---|--------------|--------------|--------------|
| C | 3. 37213800  | -0. 72001900 | -0. 46767300 |
| C | 4. 10477700  | -0. 69965600 | -1. 75967100 |
| C | -0. 09589500 | -0. 83623500 | 0. 93063800  |
| C | 0. 51290100  | -0. 54362100 | -0. 28006400 |
| C | 1. 32050000  | 0. 70350300  | -0. 47506700 |
| N | 2. 76235100  | 0. 55835000  | -0. 16849200 |
| H | -0. 44447500 | -1. 84618900 | 1. 12180500  |
| H | 1. 19699400  | 1. 07976600  | -1. 50127000 |
| H | 0. 93518500  | 1. 46700400  | 0. 20933500  |
| N | 4. 65620600  | -0. 68113100 | -2. 77570400 |
| H | 0. 20716100  | -0. 28299400 | 1. 81502800  |
| C | 3. 55559800  | 1. 71388300  | -0. 19559400 |
| C | 2. 97971900  | 2. 98965200  | -0. 34667200 |
| C | 4. 95666500  | 1. 64371200  | -0. 05988400 |
| C | 3. 77114000  | 4. 13495900  | -0. 33323800 |
| H | 1. 91361400  | 3. 10459100  | -0. 48882400 |
| C | 5. 73216900  | 2. 79663200  | -0. 05395600 |
| H | 5. 45051500  | 0. 68682100  | 0. 05405300  |
| C | 5. 15151100  | 4. 05577500  | -0. 18458900 |
| H | 3. 29093800  | 5. 10158000  | -0. 45196300 |
| H | 6. 80821300  | 2. 70097700  | 0. 05553400  |
| H | 5. 76195600  | 4. 95201800  | -0. 17860200 |
| C | 4. 21011700  | -1. 30534000 | 0. 66921200  |
| C | 5. 31025200  | -2. 12724200 | 0. 42657400  |
| C | 3. 80672100  | -1. 06324900 | 1. 98233500  |
| C | 6. 00476900  | -2. 69821100 | 1. 49130700  |
| H | 5. 63363900  | -2. 31816000 | -0. 59304000 |
| C | 4. 50134000  | -1. 63549300 | 3. 04385800  |
| H | 2. 95516800  | -0. 41425300 | 2. 16169000  |
| C | 5. 60297100  | -2. 45428100 | 2. 80177200  |
| H | 6. 86310500  | -3. 33169700 | 1. 29210000  |
| H | 4. 18364000  | -1. 43807800 | 4. 06276800  |
| H | 6. 14624100  | -2. 89729700 | 3. 63004800  |
| C | 0. 24842300  | -1. 34394200 | -1. 45252400 |
| O | 0. 85670300  | -1. 27619100 | -2. 51487300 |
| O | -0. 78649600 | -2. 21210600 | -1. 28134900 |
| C | -1. 08091200 | -3. 04315100 | -2. 40110100 |
| H | -0. 22654400 | -3. 67644200 | -2. 64975500 |
| H | -1. 93158800 | -3. 65496100 | -2. 10300400 |
| H | -1. 33801100 | -2. 43671500 | -3. 27229600 |
| P | -2. 37418300 | -0. 11468400 | 0. 87389200  |
| C | -2. 40477200 | 0. 66776500  | -0. 79396100 |
| C | -3. 57784300 | 1. 57483000  | -1. 16635000 |

|   |             |             |             |
|---|-------------|-------------|-------------|
| H | -2.31160900 | -0.15776700 | -1.51085400 |
| H | -1.46226600 | 1.22911400  | -0.86790200 |
| C | -3.39396600 | 2.19902600  | -2.55006700 |
| H | -4.51551200 | 1.00703700  | -1.15068100 |
| H | -3.68373300 | 2.37605400  | -0.42368900 |
| C | -4.56111700 | 3.10303500  | -2.93676100 |
| H | -2.45801800 | 2.77102000  | -2.56442900 |
| H | -3.27999000 | 1.39917700  | -3.29206200 |
| H | -4.41392200 | 3.54630800  | -3.92483200 |
| H | -5.49965000 | 2.54027600  | -2.95642400 |
| H | -4.67708200 | 3.91816300  | -2.21553400 |
| C | -3.40214400 | -1.64622100 | 0.75754400  |
| C | -4.60901400 | -1.63839900 | -0.18352500 |
| H | -3.71046600 | -1.89384200 | 1.78122500  |
| H | -2.70745900 | -2.43375600 | 0.43998900  |
| C | -5.31791600 | -2.99294200 | -0.21055500 |
| H | -5.32418300 | -0.86261900 | 0.11453700  |
| H | -4.27858800 | -1.38924300 | -1.20065000 |
| C | -6.51782700 | -2.99902900 | -1.15343600 |
| H | -4.60110600 | -3.76673700 | -0.51323900 |
| H | -5.64111600 | -3.24989300 | 0.80582400  |
| H | -7.01174000 | -3.97402500 | -1.16649600 |
| H | -7.25654200 | -2.25147900 | -0.84766100 |
| H | -6.21001100 | -2.76369400 | -2.17710200 |
| C | -3.24695200 | 1.03417400  | 2.03903900  |
| C | -4.77789500 | 1.04403400  | 2.05808100  |
| H | -2.85587800 | 2.03626900  | 1.82104900  |
| H | -2.87681300 | 0.77749800  | 3.03875000  |
| C | -5.32491500 | 2.03811600  | 3.08364800  |
| H | -5.17310900 | 1.29584200  | 1.06739400  |
| H | -5.15005500 | 0.03992400  | 2.29970300  |
| C | -6.85040500 | 2.04158000  | 3.12883500  |
| H | -4.92312700 | 1.79112600  | 4.07410000  |
| H | -4.95689500 | 3.04255700  | 2.84054300  |
| H | -7.22729400 | 2.75857500  | 3.86258700  |
| H | -7.26807700 | 2.30775100  | 2.15272000  |
| H | -7.23423300 | 1.05217000  | 3.39675600  |
| H | 2.54309400  | -1.41756100 | -0.62538700 |

**M1 (R)**

|   |             |             |             |
|---|-------------|-------------|-------------|
| C | 3.31882100  | -0.79647600 | -0.26645500 |
| C | 3.97852000  | -1.25854100 | -1.52106200 |
| C | -0.43537900 | -0.60312700 | 0.86420400  |
| C | 0.32594700  | -1.19021900 | -0.28261100 |



|   |              |              |              |
|---|--------------|--------------|--------------|
| C | 1. 11200700  | -0. 28087900 | -1. 15894100 |
| N | 2. 35194200  | 0. 25465400  | -0. 50246700 |
| H | -0. 01488400 | 0. 36069500  | 1. 18709600  |
| H | 0. 54644200  | 0. 59716800  | -1. 47975100 |
| H | 1. 40712000  | -0. 82228400 | -2. 06918400 |
| N | 4. 45835800  | -1. 61078000 | -2. 51289800 |
| H | -0. 45826800 | -1. 25906500 | 1. 74208800  |
| C | 2. 81005100  | 1. 53230300  | -0. 88941500 |
| C | 1. 90677500  | 2. 60944200  | -0. 84506000 |
| C | 4. 13314600  | 1. 80202500  | -1. 26858000 |
| C | 2. 30118700  | 3. 89192200  | -1. 19921200 |
| H | 0. 89168100  | 2. 43744800  | -0. 50075000 |
| C | 4. 52509700  | 3. 09671300  | -1. 60676400 |
| H | 4. 87114900  | 1. 00968000  | -1. 30382700 |
| C | 3. 61665800  | 4. 14848500  | -1. 58639300 |
| H | 1. 57795100  | 4. 70045600  | -1. 15431000 |
| H | 5. 55663200  | 3. 27403900  | -1. 89563300 |
| H | 3. 92675300  | 5. 15212800  | -1. 85644500 |
| C | 4. 31591300  | -0. 47650900 | 0. 83978500  |
| C | 3. 82591000  | 0. 11491500  | 2. 00618600  |
| C | 5. 66857000  | -0. 79943400 | 0. 75045200  |
| C | 4. 68177300  | 0. 38172100  | 3. 06943400  |
| H | 2. 77169200  | 0. 36916700  | 2. 06389900  |
| C | 6. 52553300  | -0. 53125400 | 1. 81719600  |
| H | 6. 06058800  | -1. 25513500 | -0. 15476000 |
| C | 6. 03557500  | 0. 05989900  | 2. 97766100  |
| H | 4. 29197300  | 0. 84232400  | 3. 97161600  |
| H | 7. 57810900  | -0. 78240100 | 1. 73532700  |
| H | 6. 70368400  | 0. 27113200  | 3. 80627700  |
| C | 0. 52116900  | -2. 56756000 | -0. 40601300 |
| O | 1. 26927600  | -3. 16946000 | -1. 20192600 |
| O | -0. 22771200 | -3. 31418000 | 0. 50480800  |
| C | -0. 04007600 | -4. 71562200 | 0. 42943900  |
| H | -0. 29727300 | -5. 10018700 | -0. 56123700 |
| H | -0. 70240400 | -5. 15207000 | 1. 17844400  |
| H | 0. 99571200  | -4. 99291400 | 0. 64563000  |
| P | -2. 20063900 | -0. 27288200 | 0. 47240600  |
| C | -2. 23819900 | 0. 79045700  | -1. 00964900 |
| C | -3. 58314500 | 1. 42308800  | -1. 41074100 |
| H | -1. 50515200 | 1. 58443200  | -0. 81884400 |
| H | -1. 81748000 | 0. 16576300  | -1. 80464300 |
| C | -3. 83444600 | 2. 77683500  | -0. 74377600 |
| H | -4. 42010800 | 0. 74669400  | -1. 20295600 |
| H | -3. 58097900 | 1. 56393200  | -2. 49717500 |

|   |             |             |             |
|---|-------------|-------------|-------------|
| C | -5.23166000 | 3.30956600  | -1.04450800 |
| H | -3.07576500 | 3.48665300  | -1.09328200 |
| H | -3.70015900 | 2.69918300  | 0.34168400  |
| H | -5.38707400 | 4.29298700  | -0.59491600 |
| H | -5.99850800 | 2.63333000  | -0.65098600 |
| H | -5.39094500 | 3.40091600  | -2.12340300 |
| C | -2.97719600 | 0.56480400  | 1.89503900  |
| C | -4.50993800 | 0.58290800  | 1.92917700  |
| H | -2.59089000 | 0.05124400  | 2.78436800  |
| H | -2.56531900 | 1.58095300  | 1.92046500  |
| C | -5.03168900 | 1.47446100  | 3.05533700  |
| H | -4.88395100 | -0.43865800 | 2.06708000  |
| H | -4.91957900 | 0.94053800  | 0.97678600  |
| C | -6.55604800 | 1.49402500  | 3.11145600  |
| H | -4.65128700 | 2.49304700  | 2.90731000  |
| H | -4.62326700 | 1.12419100  | 4.01083200  |
| H | -6.91468800 | 2.13901500  | 3.91717800  |
| H | -6.95395600 | 0.48892600  | 3.28085900  |
| H | -6.97419200 | 1.86563900  | 2.17046600  |
| C | -3.01212800 | -1.88331800 | 0.21057600  |
| C | -4.34595400 | -1.92345400 | -0.55165100 |
| H | -2.25779400 | -2.50160800 | -0.28807900 |
| H | -3.11940300 | -2.29151500 | 1.22278300  |
| C | -4.18081300 | -1.93677800 | -2.07136100 |
| H | -5.00329500 | -1.10006800 | -0.25020400 |
| H | -4.86693800 | -2.83989200 | -0.25265700 |
| C | -5.52685600 | -1.91852100 | -2.78866300 |
| H | -3.61356400 | -2.83115900 | -2.35420400 |
| H | -3.58196400 | -1.08013100 | -2.40030100 |
| H | -5.40053400 | -1.96285100 | -3.87293500 |
| H | -6.08184900 | -1.00489700 | -2.55067000 |
| H | -6.14208400 | -2.77102200 | -2.48444500 |
| H | 2.72428500  | -1.66184100 | 0.05331300  |

**TS2 (RR)**

|   |             |             |             |
|---|-------------|-------------|-------------|
| C | 2.85811500  | -0.97175200 | -0.02262600 |
| C | 3.93844000  | -1.52196400 | -0.80556300 |
| C | -0.27500800 | -1.49997600 | 0.65261400  |
| C | 0.46711900  | -1.78319200 | -0.64156600 |
| C | 0.93007600  | -0.60048400 | -1.44861300 |
| N | 2.07138900  | 0.01216400  | -0.72070700 |
| H | -0.65688400 | -2.42691800 | 1.08714100  |
| H | 1.23130900  | -0.94011100 | -2.44865100 |
| H | 0.16125800  | 0.16744900  | -1.58759900 |

|   |              |              |              |
|---|--------------|--------------|--------------|
| N | 4. 77152000  | -2. 00964300 | -1. 45551200 |
| H | 0. 38322700  | -1. 03386400 | 1. 39763300  |
| C | 2. 62861400  | 1. 19543500  | -1. 20846500 |
| C | 1. 95799200  | 1. 98022500  | -2. 16625400 |
| C | 3. 86907700  | 1. 66161800  | -0. 72935700 |
| C | 2. 49654500  | 3. 18987800  | -2. 59758900 |
| H | 1. 01881000  | 1. 65173200  | -2. 59434600 |
| C | 4. 39496000  | 2. 86743900  | -1. 17593600 |
| H | 4. 41607800  | 1. 07540100  | 0. 00025700  |
| C | 3. 71560700  | 3. 64900100  | -2. 10923200 |
| H | 1. 95164200  | 3. 77013100  | -3. 33651100 |
| H | 5. 35336100  | 3. 19781500  | -0. 78646100 |
| H | 4. 13183400  | 4. 58942900  | -2. 45345800 |
| C | 3. 18182500  | -0. 71668100 | 1. 40849600  |
| C | 2. 56007200  | 0. 32256900  | 2. 11762300  |
| C | 4. 09305600  | -1. 53110100 | 2. 09808400  |
| C | 2. 82297200  | 0. 52333200  | 3. 46940500  |
| H | 1. 87375100  | 0. 98001200  | 1. 59143600  |
| C | 4. 35713600  | -1. 32442100 | 3. 44801700  |
| H | 4. 59584100  | -2. 33578100 | 1. 56775400  |
| C | 3. 72093900  | -0. 29902100 | 4. 14679200  |
| H | 2. 32780500  | 1. 33566000  | 3. 99324500  |
| H | 5. 06493400  | -1. 97142500 | 3. 95773200  |
| H | 3. 92705200  | -0. 14006300 | 5. 20000600  |
| C | 0. 07347800  | -2. 93914800 | -1. 42392000 |
| O | 0. 46099200  | -3. 21560300 | -2. 55241400 |
| O | -0. 77565700 | -3. 77536800 | -0. 75685200 |
| C | -1. 11639500 | -4. 97251300 | -1. 45011900 |
| H | -0. 22196600 | -5. 55357700 | -1. 68412500 |
| H | -1. 76584100 | -5. 53340000 | -0. 77960500 |
| H | -1. 64149500 | -4. 74448900 | -2. 38047300 |
| P | -1. 69787400 | -0. 36334100 | 0. 50080500  |
| C | -2. 58032600 | -0. 77521700 | -1. 03803100 |
| C | -4. 02923000 | -0. 28817900 | -1. 13564700 |
| H | -2. 53793400 | -1. 87105700 | -1. 09134000 |
| H | -1. 98071300 | -0. 39757600 | -1. 87389300 |
| C | -4. 64969200 | -0. 66721000 | -2. 48034200 |
| H | -4. 62313700 | -0. 73214400 | -0. 32741800 |
| H | -4. 07959800 | 0. 79983400  | -1. 01019600 |
| C | -6. 10423600 | -0. 21879700 | -2. 58390000 |
| H | -4. 06026100 | -0. 21527800 | -3. 28688100 |
| H | -4. 58152200 | -1. 75360600 | -2. 61291700 |
| H | -6. 53534600 | -0. 49529800 | -3. 54899000 |
| H | -6. 71083400 | -0. 67985700 | -1. 79849900 |

|                 |             |             |             |
|-----------------|-------------|-------------|-------------|
| H               | -6.18612000 | 0.86713900  | -2.47629400 |
| C               | -2.79958600 | -0.60224000 | 1.93126600  |
| C               | -3.73361300 | 0.57095800  | 2.25190400  |
| H               | -2.14174700 | -0.80355200 | 2.78533700  |
| H               | -3.36504600 | -1.52261000 | 1.74207800  |
| C               | -4.64050800 | 0.24858900  | 3.43986100  |
| H               | -3.14041900 | 1.46371600  | 2.48420500  |
| H               | -4.35491400 | 0.82075100  | 1.38444400  |
| C               | -5.54993600 | 1.41985000  | 3.79888500  |
| H               | -5.24431900 | -0.63412600 | 3.19855300  |
| H               | -4.02003300 | -0.02189900 | 4.30239800  |
| H               | -6.19762800 | 1.17215100  | 4.64313600  |
| H               | -4.96170000 | 2.30105800  | 4.07213900  |
| H               | -6.18763400 | 1.69215800  | 2.95236700  |
| C               | -1.05156800 | 1.34773900  | 0.52433600  |
| C               | -1.83678900 | 2.37968600  | -0.29024200 |
| H               | -0.01461000 | 1.29204000  | 0.17144100  |
| H               | -1.00029000 | 1.63689200  | 1.58126400  |
| C               | -1.12264700 | 3.73104500  | -0.29483600 |
| H               | -1.94955400 | 2.03148300  | -1.32588100 |
| H               | -2.84793600 | 2.49816200  | 0.11890000  |
| C               | -1.87797200 | 4.77620000  | -1.10997800 |
| H               | -1.00008000 | 4.07723900  | 0.73834300  |
| H               | -0.11352400 | 3.59385800  | -0.70366100 |
| H               | -1.34857700 | 5.73197800  | -1.11410400 |
| H               | -1.99364500 | 4.45020000  | -2.14828700 |
| H               | -2.87760400 | 4.94561600  | -0.69829800 |
| H               | 1.79799100  | -1.88503800 | -0.15673600 |
| <b>TS2 (RS)</b> |             |             |             |
| C               | 2.85488200  | -0.04864700 | -1.03541500 |
| C               | -0.45431200 | -0.53465800 | -1.03114800 |
| C               | 0.60505200  | -0.80412400 | 0.01599600  |
| C               | 1.19143000  | 0.36593100  | 0.75666700  |
| N               | 2.41259200  | 0.80914100  | 0.02144600  |
| H               | -0.61516700 | -1.42535900 | -1.64518500 |
| H               | 0.50448600  | 1.21947400  | 0.82638000  |
| H               | 1.45412400  | 0.06861100  | 1.77961700  |
| H               | -0.13135800 | 0.26974000  | -1.70592600 |
| C               | 3.17291600  | 1.85943400  | 0.49988400  |
| C               | 2.78743600  | 2.58385000  | 1.64676200  |
| C               | 4.36158800  | 2.24987800  | -0.15377600 |
| C               | 3.55861400  | 3.64868700  | 2.10511400  |
| H               | 1.88729800  | 2.31609200  | 2.18708900  |
| C               | 5.11706600  | 3.31320200  | 0.31959700  |

|   |             |             |             |
|---|-------------|-------------|-------------|
| H | 4.69082800  | 1.70816100  | -1.03300400 |
| C | 4.72801400  | 4.02777100  | 1.45262100  |
| H | 3.23393500  | 4.18573700  | 2.99188200  |
| H | 6.02623800  | 3.58551800  | -0.20873200 |
| H | 5.32337900  | 4.85799800  | 1.81662900  |
| C | 0.52808800  | -2.05139200 | 0.75842700  |
| O | 1.11930900  | -2.32319700 | 1.79437700  |
| O | -0.26730000 | -2.97249100 | 0.14311200  |
| C | -0.37989100 | -4.22262500 | 0.81715800  |
| H | -0.82970900 | -4.08721400 | 1.80445700  |
| H | -1.02166700 | -4.84306900 | 0.19363100  |
| H | 0.60008400  | -4.68852500 | 0.93648300  |
| H | 1.72512500  | -0.86376300 | -0.79170300 |
| P | -2.13129400 | -0.04145300 | -0.45045500 |
| C | -2.58797800 | -1.11037300 | 0.95066400  |
| C | -3.80082400 | -0.70740300 | 1.79150500  |
| H | -1.69430700 | -1.13942500 | 1.58651900  |
| H | -2.70832900 | -2.11562500 | 0.53064200  |
| C | -4.04337500 | -1.72228400 | 2.91009000  |
| H | -3.63853400 | 0.28363000  | 2.23178700  |
| H | -4.70018800 | -0.64097100 | 1.16975400  |
| C | -5.23855700 | -1.34068200 | 3.77824300  |
| H | -4.20386700 | -2.71180000 | 2.46585800  |
| H | -3.14019200 | -1.79815000 | 3.52749000  |
| H | -5.41038900 | -2.08302700 | 4.56116500  |
| H | -5.07726300 | -0.37174400 | 4.26018500  |
| H | -6.14965800 | -1.26853300 | 3.17646800  |
| C | -2.08005800 | 1.73633400  | 0.01260200  |
| C | -3.28151800 | 2.61566700  | -0.37234100 |
| H | -1.18529100 | 2.11082300  | -0.49485600 |
| H | -1.88134700 | 1.79176000  | 1.08928700  |
| C | -4.45057200 | 2.59051600  | 0.60863900  |
| H | -3.62856000 | 2.36341000  | -1.38205300 |
| H | -2.91033900 | 3.64396900  | -0.43877100 |
| C | -5.60758400 | 3.45829800  | 0.12215500  |
| H | -4.80638300 | 1.56614500  | 0.75953900  |
| H | -4.10060500 | 2.93857700  | 1.58794600  |
| H | -6.42980500 | 3.46426900  | 0.84122300  |
| H | -5.28283400 | 4.49196200  | -0.03126400 |
| H | -5.99614000 | 3.08595700  | -0.83216200 |
| C | -3.22710700 | -0.30028800 | -1.88536600 |
| C | -4.73819200 | -0.31113000 | -1.63331300 |
| H | -2.91442600 | -1.25654700 | -2.31995100 |
| H | -2.95535800 | 0.47652500  | -2.61140900 |

|   |             |             |             |
|---|-------------|-------------|-------------|
| C | -5.51434400 | -0.36017900 | -2.94945400 |
| H | -5.00103700 | -1.18250800 | -1.02239800 |
| H | -5.04901900 | 0.57786900  | -1.07348800 |
| C | -7.02209000 | -0.39849600 | -2.72063700 |
| H | -5.25002600 | 0.51871700  | -3.54996700 |
| H | -5.19806600 | -1.23942400 | -3.52321400 |
| H | -7.56521400 | -0.42244900 | -3.66827700 |
| H | -7.30756300 | -1.28418000 | -2.14513800 |
| H | -7.35298300 | 0.48413200  | -2.16404200 |
| C | 4.05478400  | -0.89044500 | -0.79268500 |
| C | 4.30847400  | -1.36035400 | 0.50529100  |
| C | 4.92484500  | -1.28046400 | -1.82105900 |
| C | 5.39534800  | -2.18924800 | 0.76206800  |
| H | 3.63442500  | -1.07813000 | 1.30984800  |
| C | 6.00993200  | -2.11233300 | -1.55984200 |
| H | 4.75196100  | -0.92231800 | -2.83273700 |
| C | 6.25548200  | -2.57119600 | -0.26724500 |
| H | 5.57188600  | -2.54082300 | 1.77452500  |
| H | 6.67175300  | -2.39675400 | -2.37269500 |
| H | 7.10431900  | -3.21578900 | -0.06360100 |
| C | 2.73984200  | 0.53321200  | -2.34482300 |
| N | 2.60237700  | 0.98451500  | -3.40990500 |

**M2 (RR)**

|   |             |             |             |
|---|-------------|-------------|-------------|
| C | 2.66505700  | -0.62058400 | -1.28097800 |
| C | 2.86271800  | -0.26500400 | -2.61677700 |
| C | -0.24885300 | 0.79751900  | -1.68708700 |
| C | 0.85987200  | 1.65666400  | -1.06888800 |
| C | 1.63044200  | 1.07711200  | 0.14113300  |
| N | 2.84436700  | 0.39272800  | -0.28475100 |
| H | -0.66999800 | 1.34413700  | -2.53424200 |
| H | 1.90090400  | 1.90790600  | 0.79338700  |
| H | 0.98021500  | 0.39975800  | 0.72482700  |
| N | 3.01301900  | 0.03098800  | -3.74446300 |
| H | 0.18482700  | -0.13558500 | -2.06419500 |
| C | 3.92785400  | 0.31327900  | 0.59843900  |
| C | 3.88730000  | 0.82239800  | 1.90909800  |
| C | 5.12460000  | -0.29335000 | 0.16925400  |
| C | 5.01002200  | 0.75591100  | 2.73337900  |
| H | 2.97777000  | 1.25142800  | 2.31159000  |
| C | 6.23215000  | -0.35501000 | 1.00172700  |
| H | 5.16167200  | -0.70935200 | -0.83138800 |
| C | 6.19304700  | 0.17435800  | 2.29319300  |
| H | 4.94260500  | 1.15853000  | 3.73994700  |

|   |             |             |             |
|---|-------------|-------------|-------------|
| H | 7.14160400  | -0.82176700 | 0.63408900  |
| H | 7.06201400  | 0.12484700  | 2.94027200  |
| C | 2.07505400  | -1.88108500 | -0.92394000 |
| C | 1.53779000  | -2.76792000 | -1.89351500 |
| C | 1.96353700  | -2.28496200 | 0.43160500  |
| C | 0.90934800  | -3.94856800 | -1.52784700 |
| H | 1.60590500  | -2.49660000 | -2.94443400 |
| C | 1.33896100  | -3.47786300 | 0.78267200  |
| H | 2.37623800  | -1.64907400 | 1.20978500  |
| C | 0.78929400  | -4.31934600 | -0.18437100 |
| H | 0.49719400  | -4.58966200 | -2.30303100 |
| H | 1.28123100  | -3.75232300 | 1.83338100  |
| H | 0.29594000  | -5.24362600 | 0.09632000  |
| C | 0.35241600  | 3.07620800  | -0.86093600 |
| O | -0.73147300 | 3.47399700  | -1.23508600 |
| O | 1.25776500  | 3.86011300  | -0.28213900 |
| C | 0.87476600  | 5.23280600  | -0.11710800 |
| H | -0.02862700 | 5.29782300  | 0.49102100  |
| H | 1.71156600  | 5.71428800  | 0.38277000  |
| H | 0.69214400  | 5.68933100  | -1.09094300 |
| P | -1.69528100 | 0.27281600  | -0.67175600 |
| C | -1.86293900 | 1.34825300  | 0.79906600  |
| C | -3.11288400 | 1.20382900  | 1.68632500  |
| H | -1.80690000 | 2.37089400  | 0.41668500  |
| H | -0.94732500 | 1.17368800  | 1.37456300  |
| C | -4.24763700 | 2.13692900  | 1.26381400  |
| H | -3.46624500 | 0.16816700  | 1.72848900  |
| H | -2.81754900 | 1.45130400  | 2.71194400  |
| C | -5.50682500 | 1.92104900  | 2.09603000  |
| H | -3.90303000 | 3.17254700  | 1.36527200  |
| H | -4.47694100 | 1.99438100  | 0.20190700  |
| H | -6.29607500 | 2.61934100  | 1.80788300  |
| H | -5.89344600 | 0.90415400  | 1.96813700  |
| H | -5.29808400 | 2.06604300  | 3.16043100  |
| C | -3.10792200 | 0.35168000  | -1.84438400 |
| C | -4.20070800 | -0.72353600 | -1.74198500 |
| H | -2.61841600 | 0.25769900  | -2.81957500 |
| H | -3.52192800 | 1.36516000  | -1.80111100 |
| C | -5.27012400 | -0.48944200 | -0.67985100 |
| H | -4.69085100 | -0.76553500 | -2.72086500 |
| H | -3.74306800 | -1.71052300 | -1.60059300 |
| C | -6.27125600 | -1.63929800 | -0.62213100 |
| H | -4.80785600 | -0.36591300 | 0.30568700  |
| H | -5.79156700 | 0.45163400  | -0.89330700 |

|   |             |             |             |
|---|-------------|-------------|-------------|
| H | -7.04670500 | -1.45067000 | 0.12411900  |
| H | -6.75962300 | -1.78016400 | -1.59111800 |
| H | -5.77041200 | -2.57705300 | -0.36025400 |
| C | -1.37299500 | -1.46989300 | -0.25065200 |
| C | -2.23541700 | -2.14052500 | 0.82588800  |
| H | -0.31647300 | -1.52232000 | 0.03676000  |
| H | -1.43990700 | -1.99289900 | -1.21281400 |
| C | -1.71726300 | -1.89307400 | 2.24344200  |
| H | -3.28782100 | -1.84089200 | 0.74690400  |
| H | -2.21498900 | -3.21862400 | 0.63082600  |
| C | -2.67039500 | -2.43867800 | 3.30137900  |
| H | -0.73160600 | -2.36312600 | 2.33510300  |
| H | -1.55688300 | -0.82171100 | 2.41215900  |
| H | -2.27174000 | -2.29690100 | 4.30852300  |
| H | -3.64103300 | -1.93328900 | 3.24735200  |
| H | -2.84452000 | -3.50887100 | 3.15281000  |
| H | 1.61090400  | 1.77315700  | -1.86242000 |

**M2 (RS)**

|   |             |             |             |
|---|-------------|-------------|-------------|
| C | 2.52199900  | 0.18273200  | -1.00132300 |
| C | -0.08337300 | -1.75411200 | -0.41944200 |
| C | 1.05240600  | -1.62244300 | 0.62825800  |
| C | 1.31980500  | -0.21503900 | 1.15254000  |
| N | 1.78394200  | 0.69359900  | 0.11271700  |
| H | -0.44420100 | -2.78866400 | -0.45100000 |
| H | 0.39884400  | 0.18067700  | 1.60154400  |
| H | 2.03974700  | -0.29385000 | 1.98299500  |
| H | 0.29968500  | -1.52104200 | -1.41884900 |
| C | 1.86342100  | 2.05003300  | 0.44597000  |
| C | 1.48399100  | 2.53470200  | 1.71265600  |
| C | 2.30537000  | 2.98700100  | -0.50952600 |
| C | 1.53236000  | 3.89976900  | 1.99448700  |
| H | 1.16888700  | 1.85816300  | 2.49729400  |
| C | 2.35037300  | 4.34071100  | -0.21087300 |
| H | 2.61464600  | 2.62960700  | -1.48459500 |
| C | 1.96094800  | 4.81674100  | 1.04263300  |
| H | 1.23492900  | 4.23930400  | 2.98232900  |
| H | 2.69558700  | 5.03526100  | -0.97136900 |
| H | 1.99754900  | 5.87665600  | 1.26954300  |
| C | 0.77116900  | -2.54398000 | 1.80752000  |
| O | 0.31178900  | -2.15092300 | 2.85608100  |
| O | 0.99397300  | -3.85686500 | 1.66133900  |
| C | 1.75737200  | -4.37661900 | 0.56588300  |
| H | 2.77521700  | -3.98169700 | 0.58228000  |



|   |             |             |             |
|---|-------------|-------------|-------------|
| H | 1.78307700  | -5.45334200 | 0.72011400  |
| H | 1.28707600  | -4.16336400 | -0.39627600 |
| H | 1.96083400  | -1.95842800 | 0.12162400  |
| P | -1.61214900 | -0.75185700 | -0.26643200 |
| C | -2.34143300 | -1.05880800 | 1.37448400  |
| C | -3.42112400 | -0.08353300 | 1.85046200  |
| H | -1.50496200 | -1.05955200 | 2.08182100  |
| H | -2.72107500 | -2.08815700 | 1.33994800  |
| C | -3.89113000 | -0.43668300 | 3.26204100  |
| H | -3.02120600 | 0.93772600  | 1.84939400  |
| H | -4.28265700 | -0.09392800 | 1.17367400  |
| C | -4.95040000 | 0.53783200  | 3.76799500  |
| H | -4.29021800 | -1.45780200 | 3.26249500  |
| H | -3.02769500 | -0.43650000 | 3.93772500  |
| H | -5.27972800 | 0.27465000  | 4.77594500  |
| H | -4.55810700 | 1.55893100  | 3.79709000  |
| H | -5.82816800 | 0.53451200  | 3.11462300  |
| C | -1.24267100 | 1.00879700  | -0.61558800 |
| C | -2.26427300 | 1.80985700  | -1.43937400 |
| H | -0.30041200 | 0.95576400  | -1.16929800 |
| H | -1.01668500 | 1.50819900  | 0.33506300  |
| C | -3.41962400 | 2.42756300  | -0.65585800 |
| H | -2.65048800 | 1.20159600  | -2.26676300 |
| H | -1.70147300 | 2.62119900  | -1.91405500 |
| C | -4.37037800 | 3.18845600  | -1.57543700 |
| H | -3.97987900 | 1.65708900  | -0.11620500 |
| H | -3.01168300 | 3.09979800  | 0.10865800  |
| H | -5.18094500 | 3.65564000  | -1.01165700 |
| H | -3.83985700 | 3.97419500  | -2.12181700 |
| H | -4.81722500 | 2.51277600  | -2.31294200 |
| C | -2.67443800 | -1.42696500 | -1.58453700 |
| C | -4.16806000 | -1.10740000 | -1.46253700 |
| H | -2.52337800 | -2.51208000 | -1.57683100 |
| H | -2.26216400 | -1.05504300 | -2.53084900 |
| C | -4.93714900 | -1.57196000 | -2.69881900 |
| H | -4.57422900 | -1.60096600 | -0.57154500 |
| H | -4.32723200 | -0.03153500 | -1.33016000 |
| C | -6.42864900 | -1.27246700 | -2.58447100 |
| H | -4.52232300 | -1.07355300 | -3.58332200 |
| H | -4.77805000 | -2.64742500 | -2.84023700 |
| H | -6.96776800 | -1.60100300 | -3.47605400 |
| H | -6.86406100 | -1.78151400 | -1.71927800 |
| H | -6.60048500 | -0.19830600 | -2.46262900 |
| C | 3.89617600  | -0.21680400 | -0.85655000 |

|   |            |             |             |
|---|------------|-------------|-------------|
| C | 4.58453500 | -0.03639000 | 0.36669200  |
| C | 4.62218200 | -0.82499700 | -1.91088800 |
| C | 5.90481800 | -0.44502300 | 0.52059500  |
| H | 4.07397100 | 0.44855600  | 1.19442400  |
| C | 5.93887100 | -1.22587400 | -1.74516300 |
| H | 4.12846900 | -0.97999900 | -2.86731500 |
| C | 6.60110300 | -1.04607600 | -0.52708200 |
| H | 6.39710800 | -0.28650100 | 1.47678700  |
| H | 6.45847600 | -1.69052300 | -2.57935200 |
| H | 7.63027200 | -1.36481600 | -0.40151900 |
| C | 1.84213100 | 0.09579800  | -2.21428400 |
| N | 1.21179700 | 0.02219200  | -3.20659100 |

**TS3 (RR)**

|   |             |             |             |
|---|-------------|-------------|-------------|
| C | -2.56044900 | 0.23234800  | -0.93492300 |
| C | -2.75395800 | -0.00226500 | -2.32911100 |
| C | -0.50588200 | -0.37821400 | -0.55191300 |
| C | -1.01894100 | -1.80953800 | -0.57373900 |
| C | -2.27682200 | -1.87962900 | 0.29203400  |
| N | -3.12547600 | -0.74893000 | -0.06594000 |
| H | -0.65766600 | 0.21601200  | 0.34181000  |
| H | -1.98954900 | -1.85906600 | 1.35316600  |
| H | -2.79830000 | -2.82786400 | 0.11131400  |
| N | -2.82966300 | -0.26288300 | -3.46396700 |
| H | -0.22999700 | 0.13372900  | -1.46730000 |
| C | -4.46461300 | -0.74177200 | 0.30341900  |
| C | -5.35258400 | 0.22119700  | -0.21477100 |
| C | -4.96913000 | -1.68482000 | 1.21936600  |
| C | -6.68892400 | 0.22428400  | 0.16302400  |
| H | -4.98621900 | 0.96242100  | -0.91591200 |
| C | -6.31209600 | -1.66707600 | 1.58415900  |
| H | -4.31294800 | -2.42751400 | 1.65816200  |
| C | -7.18667200 | -0.71815500 | 1.06250900  |
| H | -7.35123900 | 0.97601500  | -0.25625600 |
| H | -6.67324000 | -2.40810800 | 2.29124900  |
| H | -8.23195900 | -0.70985800 | 1.35154100  |
| C | -2.41277800 | 1.62057100  | -0.48934100 |
| C | -2.54259500 | 1.95819600  | 0.86935900  |
| C | -1.98480600 | 2.62312500  | -1.37946100 |
| C | -2.25343500 | 3.24475800  | 1.31498900  |
| H | -2.87098300 | 1.19775500  | 1.57259400  |
| C | -1.69449300 | 3.90522700  | -0.92600800 |
| H | -1.87494500 | 2.38698500  | -2.43511200 |
| C | -1.82477100 | 4.22812600  | 0.42512900  |

|   |             |             |             |
|---|-------------|-------------|-------------|
| H | -2.36484300 | 3.47913000  | 2.36971700  |
| H | -1.36170700 | 4.65817300  | -1.63470700 |
| H | -1.59778700 | 5.22907600  | 0.77660600  |
| C | 0.00235400  | -2.82114100 | -0.08883800 |
| O | 0.15579500  | -3.16741500 | 1.05981100  |
| O | 0.73457200  | -3.29075800 | -1.10645100 |
| C | 1.73290600  | -4.25920800 | -0.76072200 |
| H | 2.47909200  | -3.81903800 | -0.09546800 |
| H | 2.19298400  | -4.55780700 | -1.70009700 |
| H | 1.27051500  | -5.11453900 | -0.26621900 |
| P | 1.73162500  | -0.29957900 | -0.02215400 |
| C | 2.49965100  | -1.02805200 | 1.49115000  |
| C | 3.63402300  | -0.23881900 | 2.15081900  |
| H | 1.67721500  | -1.17010200 | 2.20194300  |
| H | 2.83536800  | -2.03587700 | 1.21957600  |
| C | 4.19649700  | -0.97151600 | 3.36931100  |
| H | 3.26414900  | 0.74598400  | 2.46252800  |
| H | 4.44186300  | -0.05950500 | 1.43244200  |
| C | 5.30746800  | -0.17979400 | 4.05329000  |
| H | 4.57591700  | -1.95126500 | 3.05441700  |
| H | 3.38380300  | -1.16531800 | 4.07992600  |
| H | 5.70501800  | -0.71657700 | 4.91830500  |
| H | 4.93801900  | 0.79045800  | 4.39936200  |
| H | 6.13530900  | 0.00550300  | 3.36180600  |
| C | 1.68515600  | 1.52410300  | 0.23592100  |
| C | 2.92632400  | 2.35271100  | -0.09832500 |
| H | 0.83740100  | 1.89019200  | -0.36324600 |
| H | 1.39284800  | 1.67401500  | 1.28408100  |
| C | 2.67150700  | 3.84457400  | 0.12088400  |
| H | 3.21119300  | 2.18657800  | -1.14517800 |
| H | 3.77800200  | 2.03551600  | 0.51440500  |
| C | 3.88442900  | 4.69839700  | -0.23707100 |
| H | 2.39486200  | 4.01002400  | 1.16952200  |
| H | 1.80542400  | 4.15141700  | -0.47914400 |
| H | 3.68793400  | 5.76032300  | -0.06984600 |
| H | 4.15632600  | 4.56710500  | -1.28902600 |
| H | 4.75107000  | 4.41673000  | 0.36905200  |
| C | 2.81872200  | -0.64593700 | -1.47056600 |
| C | 4.33158000  | -0.68657700 | -1.24048800 |
| H | 2.47678100  | -1.60901900 | -1.86813600 |
| H | 2.56056200  | 0.10484100  | -2.22859600 |
| C | 5.08698200  | -1.03401600 | -2.52369000 |
| H | 4.56746100  | -1.43498200 | -0.47241900 |
| H | 4.68814000  | 0.27857900  | -0.86152900 |

|   |             |             |             |
|---|-------------|-------------|-------------|
| C | 6.59518700  | -1.10482200 | -2.30270400 |
| H | 4.85649200  | -0.28413600 | -3.29022400 |
| H | 4.71951500  | -1.99410400 | -2.90635900 |
| H | 7.12251500  | -1.35335200 | -3.22701600 |
| H | 6.84357400  | -1.86692300 | -1.55738100 |
| H | 6.98156800  | -0.14673800 | -1.94150500 |
| H | -1.25990200 | -2.06070900 | -1.61021900 |

TS3 (RS)

|   |             |             |             |
|---|-------------|-------------|-------------|
| C | -2.38036100 | 0.44941600  | -0.40960100 |
| C | -2.46884700 | 0.80485800  | -1.78871900 |
| C | -0.26401500 | -0.14885300 | -0.29653700 |
| C | -0.67546500 | -1.47724300 | 0.31169100  |
| C | -2.05047300 | -1.92024500 | -0.22168300 |
| N | -2.97023700 | -0.81127700 | -0.06137000 |
| H | -0.16978900 | -0.06057700 | -1.37345200 |
| H | -1.94942000 | -2.22311600 | -1.27869300 |
| H | -2.38507700 | -2.79059400 | 0.35000600  |
| N | -2.45573600 | 1.06048400  | -2.92661100 |
| H | -0.20285000 | 0.73958900  | 0.31326600  |
| C | -4.33796200 | -1.02936200 | -0.29392200 |
| C | -4.86519400 | -2.31716000 | -0.48719600 |
| C | -5.22688800 | 0.06142500  | -0.31974500 |
| C | -6.23315400 | -2.49976200 | -0.67812800 |
| H | -4.21774400 | -3.18507100 | -0.50392200 |
| C | -6.58732200 | -0.13691800 | -0.51315000 |
| H | -4.84203200 | 1.06555100  | -0.18193300 |
| C | -7.10756700 | -1.41855500 | -0.69167700 |
| H | -6.61142300 | -3.50673700 | -0.82683000 |
| H | -7.24750400 | 0.72508500  | -0.52493200 |
| H | -8.17079700 | -1.56852800 | -0.84436700 |
| C | -2.40053600 | 1.53732700  | 0.57471900  |
| C | -2.70906900 | 1.28140900  | 1.92167500  |
| C | -1.98836900 | 2.83805700  | 0.22858000  |
| C | -2.61683000 | 2.28770600  | 2.87791700  |
| H | -3.02696400 | 0.28195000  | 2.20272100  |
| C | -1.89789900 | 3.83918200  | 1.19045100  |
| H | -1.74723200 | 3.06266700  | -0.80830800 |
| C | -2.20889900 | 3.57318200  | 2.52393600  |
| H | -2.86640100 | 2.06403800  | 3.91115900  |
| H | -1.58095800 | 4.83547700  | 0.89371200  |
| H | -2.13599800 | 4.35483100  | 3.27268100  |
| C | 0.26922100  | -2.62129200 | -0.00952800 |
| O | 0.86138900  | -2.76102800 | -1.05657400 |

|   |            |             |             |
|---|------------|-------------|-------------|
| O | 0.32535000 | -3.49847400 | 0.99387700  |
| C | 1.13976200 | -4.65579400 | 0.75940500  |
| H | 2.17778700 | -4.35530100 | 0.60209900  |
| H | 1.05050400 | -5.26632100 | 1.65470500  |
| H | 0.78133600 | -5.19737800 | -0.11706300 |
| P | 2.07488900 | -0.16020000 | -0.10943200 |
| C | 3.04524900 | -1.36896300 | 0.90727600  |
| C | 4.23474100 | -0.81589700 | 1.69580100  |
| H | 3.37172900 | -2.14417400 | 0.20174700  |
| H | 2.34331400 | -1.85294700 | 1.59839300  |
| C | 5.00339600 | -1.92888900 | 2.40822700  |
| H | 4.91611500 | -0.27126800 | 1.03041900  |
| H | 3.87771500 | -0.09148800 | 2.43802500  |
| C | 6.16879600 | -1.38996800 | 3.23282400  |
| H | 4.31277200 | -2.48365700 | 3.05539000  |
| H | 5.37255100 | -2.64377900 | 1.66267600  |
| H | 6.70662100 | -2.19612200 | 3.73795400  |
| H | 6.88154600 | -0.85595900 | 2.59671400  |
| H | 5.81418700 | -0.69050000 | 3.99626000  |
| C | 2.88399200 | -0.14321300 | -1.76102200 |
| C | 4.38082800 | 0.17012900  | -1.78273800 |
| H | 2.33147000 | 0.58255000  | -2.37120000 |
| H | 2.68377400 | -1.13007400 | -2.19490600 |
| C | 4.92701200 | 0.26006100  | -3.20787600 |
| H | 4.57527200 | 1.11755100  | -1.26165100 |
| H | 4.92737400 | -0.60838600 | -1.23546500 |
| C | 6.42439300 | 0.55285000  | -3.23676400 |
| H | 4.72021000 | -0.68151100 | -3.73107400 |
| H | 4.38338300 | 1.04361300  | -3.74972300 |
| H | 6.79907400 | 0.61520700  | -4.26152200 |
| H | 6.64500500 | 1.50252700  | -2.73930500 |
| H | 6.98472300 | -0.23257800 | -2.72015800 |
| C | 2.35759100 | 1.50985200  | 0.60961400  |
| C | 1.86046400 | 2.62419200  | -0.32138100 |
| H | 3.41127300 | 1.66572100  | 0.86208600  |
| H | 1.79493200 | 1.53257900  | 1.55296600  |
| C | 1.72293200 | 3.96161000  | 0.40378400  |
| H | 2.55360000 | 2.73002900  | -1.16601700 |
| H | 0.88439300 | 2.36354200  | -0.75498900 |
| C | 1.24910300 | 5.07377000  | -0.52647700 |
| H | 1.00847000 | 3.84077200  | 1.22775000  |
| H | 2.68525100 | 4.23181900  | 0.85558400  |
| H | 1.12383500 | 6.01807300  | 0.00977500  |
| H | 1.96517300 | 5.23816800  | -1.33764400 |

|   |             |             |             |
|---|-------------|-------------|-------------|
| H | 0.28657600  | 4.81394800  | -0.98058000 |
| H | -0.74298500 | -1.37211200 | 1.39800500  |

P(RR)

|   |             |             |             |
|---|-------------|-------------|-------------|
| C | 0.02526600  | 0.55670900  | 0.57058600  |
| C | 0.19562500  | 0.38607600  | 2.04694100  |
| C | -1.42429600 | 1.01766500  | 0.29786800  |
| C | -2.22318700 | -0.28898100 | 0.36300200  |
| C | -1.27719000 | -1.28884100 | -0.31325000 |
| N | 0.06228400  | -0.73522600 | -0.08953800 |
| H | -1.75478900 | 1.78294200  | 1.00165200  |
| H | -1.36512200 | -2.28611000 | 0.12900800  |
| H | -1.49795900 | -1.35854100 | -1.38487500 |
| N | 0.29196200  | 0.21868800  | 3.18703700  |
| H | -1.45606600 | 1.41991500  | -0.71900000 |
| C | 1.18428700  | -1.56348700 | -0.08965500 |
| C | 1.12238700  | -2.80686800 | -0.74306600 |
| C | 2.39021800  | -1.19260400 | 0.52963900  |
| C | 2.22733100  | -3.65002000 | -0.76318500 |
| H | 0.21329500  | -3.10940600 | -1.25028600 |
| C | 3.48673200  | -2.04806300 | 0.49730400  |
| H | 2.48346800  | -0.24010400 | 1.03744200  |
| C | 3.41904100  | -3.28202100 | -0.14367600 |
| H | 2.15055000  | -4.60438000 | -1.27496500 |
| H | 4.40497200  | -1.73878600 | 0.98699300  |
| H | 4.27891100  | -3.94239700 | -0.16149000 |
| C | 1.02474100  | 1.57505600  | 0.02355900  |
| C | 1.37989300  | 1.51758700  | -1.32491700 |
| C | 1.52158400  | 2.59922300  | 0.82803700  |
| C | 2.23046900  | 2.47891100  | -1.86141600 |
| H | 0.99373600  | 0.71364000  | -1.94442900 |
| C | 2.37145400  | 3.56183700  | 0.28644800  |
| H | 1.25204000  | 2.64789900  | 1.87946700  |
| C | 2.72869800  | 3.50288700  | -1.05738500 |
| H | 2.50835300  | 2.42532000  | -2.90899300 |
| H | 2.75518300  | 4.35475500  | 0.91981600  |
| H | 3.39581300  | 4.24874800  | -1.47672400 |
| C | -3.54056700 | -0.15529900 | -0.36736200 |
| O | -3.63779600 | -0.01138400 | -1.56498200 |
| O | -4.58112400 | -0.18395800 | 0.46479900  |
| C | -5.86493500 | -0.02233600 | -0.15246200 |
| H | -6.02897800 | -0.80969000 | -0.88966200 |
| H | -6.59211100 | -0.09227300 | 0.65301600  |
| H | -5.92603000 | 0.95080400  | -0.64263600 |

|               |             |             |             |
|---------------|-------------|-------------|-------------|
| H             | -2.40892700 | -0.56842300 | 1.40258400  |
| <b>P (RS)</b> |             |             |             |
| C             | 0.08926100  | 0.41654900  | 0.86123300  |
| C             | 0.74202100  | 0.33272600  | 2.19474300  |
| C             | -1.44898900 | 0.45018400  | 1.07492200  |
| C             | -1.97843000 | -0.24198600 | -0.18433000 |
| C             | -0.97757700 | -1.38950300 | -0.35799200 |
| N             | 0.27584300  | -0.81540000 | 0.11663900  |
| H             | -1.81286100 | 1.46887300  | 1.21163100  |
| H             | -0.88650200 | -1.69656300 | -1.40462300 |
| H             | -1.28467400 | -2.25845000 | 0.23993400  |
| N             | 1.22788700  | 0.26753900  | 3.24148700  |
| H             | -1.71494500 | -0.15319200 | 1.94770400  |
| C             | 1.50707700  | -1.41612300 | -0.11224200 |
| C             | 1.56354600  | -2.71003600 | -0.65961300 |
| C             | 2.71636700  | -0.76088200 | 0.18385800  |
| C             | 2.78947500  | -3.31828100 | -0.90549100 |
| H             | 0.64985200  | -3.24815900 | -0.88350700 |
| C             | 3.93228200  | -1.38915400 | -0.06117400 |
| H             | 2.71357700  | 0.24447800  | 0.58909100  |
| C             | 3.98468300  | -2.66855000 | -0.60882000 |
| H             | 2.80353600  | -4.31817600 | -1.32829500 |
| H             | 4.85031800  | -0.86060200 | 0.17626200  |
| H             | 4.93790200  | -3.14914400 | -0.79906500 |
| C             | 0.56794000  | 1.67268400  | 0.12012400  |
| C             | 0.75875100  | 1.63486200  | -1.26018600 |
| C             | 0.74818100  | 2.87259200  | 0.81082700  |
| C             | 1.12448100  | 2.79180000  | -1.94554800 |
| H             | 0.63344700  | 0.69749900  | -1.79395300 |
| C             | 1.11347900  | 4.02643400  | 0.12397200  |
| H             | 0.60545300  | 2.90690600  | 1.88805600  |
| C             | 1.30242900  | 3.98809900  | -1.25650800 |
| H             | 1.27527100  | 2.75386000  | -3.01938600 |
| H             | 1.25354700  | 4.95468400  | 0.66798600  |
| H             | 1.59069600  | 4.88697500  | -1.79140600 |
| C             | -3.39089900 | -0.74402500 | 0.01696900  |
| O             | -3.71183300 | -1.51918500 | 0.88895000  |
| O             | -4.24022700 | -0.22972400 | -0.87126300 |
| C             | -5.60444400 | -0.64813800 | -0.73217100 |
| H             | -5.67836000 | -1.73171400 | -0.83637000 |
| H             | -6.14970100 | -0.14800800 | -1.52897300 |
| H             | -5.99030300 | -0.35039200 | 0.24408900  |
| H             | -1.94368000 | 0.43191500  | -1.04300000 |

R-TS1

|   |             |             |             |
|---|-------------|-------------|-------------|
| C | 3.13577200  | -1.20639300 | 0.30404400  |
| C | 2.91132400  | -2.50738600 | 0.75144100  |
| C | -0.96907900 | -0.68533000 | 1.18826500  |
| C | -0.09574700 | -1.80175700 | 0.59661400  |
| C | 0.83613600  | -1.32315400 | -0.52333600 |
| N | 1.88469600  | -0.45877800 | 0.03123800  |
| H | -1.49014300 | -1.05225900 | 2.07636400  |
| H | 1.25650700  | -2.19417600 | -1.03699900 |
| H | 0.25964800  | -0.76924700 | -1.27358700 |
| N | 2.70548100  | -3.60720200 | 1.11950800  |
| H | -0.30682500 | 0.13248400  | 1.49787900  |
| C | 2.01862500  | 0.77691300  | -0.67566100 |
| C | 1.88807800  | 1.96995100  | 0.03761400  |
| C | 2.28034600  | 0.82251200  | -2.04799900 |
| C | 2.06636500  | 3.19530200  | -0.60077100 |
| H | 1.69043900  | 1.91535100  | 1.10441300  |
| C | 2.44141000  | 2.04744200  | -2.69037700 |
| H | 2.38676000  | -0.10970100 | -2.59688800 |
| C | 2.34911500  | 3.23592300  | -1.96562100 |
| H | 1.98677900  | 4.11820500  | -0.03400100 |
| H | 2.65576400  | 2.07557700  | -3.75413500 |
| H | 2.48753700  | 4.19018100  | -2.46379900 |
| C | 4.48512800  | -0.71342200 | 0.34853300  |
| C | 4.94040700  | 0.60413100  | 0.04751100  |
| C | 5.52796600  | -1.61821000 | 0.73447400  |
| C | 6.28397600  | 0.95897200  | 0.13129500  |
| H | 4.24992500  | 1.37486000  | -0.25903600 |
| C | 6.85668500  | -1.24754600 | 0.81180600  |
| H | 5.26342500  | -2.64252800 | 0.97823200  |
| C | 7.27078500  | 0.05531400  | 0.51224500  |
| H | 6.55591500  | 1.98399900  | -0.11194000 |
| H | 7.58748400  | -1.99442200 | 1.11406700  |
| H | 8.31371800  | 0.34625600  | 0.57355000  |
| C | -0.86579700 | -3.04734300 | 0.20157100  |
| O | -0.64535200 | -3.71797700 | -0.77946300 |
| O | -1.81512200 | -3.34732000 | 1.09890000  |
| C | -2.55627000 | -4.54664900 | 0.83350800  |
| H | -1.88444700 | -5.40560000 | 0.81086200  |
| H | -3.27299500 | -4.63787300 | 1.64600500  |
| H | -3.07072100 | -4.46619500 | -0.12713200 |
| P | -2.26712100 | 0.05176100  | 0.12324100  |
| C | -3.62142100 | 0.60472200  | 1.20955400  |



|   |             |             |             |
|---|-------------|-------------|-------------|
| C | -3.17845900 | 1.23601000  | 2.53764900  |
| H | -4.24847500 | -0.27416000 | 1.39998500  |
| H | -4.22450500 | 1.30866300  | 0.62321400  |
| C | -4.35983500 | 1.89802700  | 3.24698600  |
| H | -2.75262800 | 0.46469100  | 3.18805300  |
| H | -2.39198400 | 1.98179100  | 2.37788200  |
| C | -3.95868100 | 2.48770300  | 4.59542000  |
| H | -4.76746100 | 2.68476800  | 2.60081000  |
| H | -5.15754200 | 1.15814900  | 3.38267800  |
| H | -4.81104800 | 2.96132200  | 5.08808000  |
| H | -3.57231900 | 1.71100100  | 5.26211900  |
| H | -3.17713100 | 3.24376000  | 4.47315900  |
| C | -1.66710600 | 1.47007400  | -0.85516500 |
| C | -1.57475400 | 2.80616000  | -0.11105400 |
| H | -2.36939400 | 1.56238400  | -1.69140200 |
| H | -0.69150100 | 1.20443200  | -1.27933100 |
| C | -1.25726900 | 3.93990800  | -1.08612700 |
| H | -2.52142700 | 3.03104800  | 0.39440100  |
| H | -0.79612100 | 2.75241200  | 0.66028300  |
| C | -1.05184200 | 5.26962500  | -0.36829600 |
| H | -0.35935000 | 3.68054100  | -1.65765700 |
| H | -2.07871100 | 4.02618900  | -1.80758200 |
| H | -0.83083200 | 6.07119000  | -1.07728400 |
| H | -1.94599800 | 5.55360500  | 0.19520400  |
| H | -0.21902800 | 5.20494200  | 0.33910300  |
| C | -2.94587500 | -1.19216300 | -1.02057700 |
| C | -4.14532700 | -0.70590400 | -1.84282900 |
| H | -3.24267500 | -2.04194900 | -0.39615700 |
| H | -2.13376400 | -1.52985900 | -1.67573600 |
| C | -4.68460600 | -1.82568200 | -2.73413600 |
| H | -4.94329400 | -0.36073000 | -1.17470800 |
| H | -3.86156700 | 0.14529800  | -2.47128200 |
| C | -5.88265800 | -1.36800700 | -3.56042400 |
| H | -3.88344600 | -2.17307300 | -3.39679400 |
| H | -4.96625600 | -2.67981600 | -2.10695600 |
| H | -6.25706400 | -2.17657700 | -4.19256200 |
| H | -6.70104700 | -1.03894800 | -2.91293900 |
| H | -5.61091600 | -0.53016800 | -4.20952900 |
| H | 0.54173300  | -2.13645800 | 1.42483600  |

#### R-TS2

|   |             |            |             |
|---|-------------|------------|-------------|
| C | -3.53850800 | 0.65255900 | 0.17718300  |
| C | -0.31760900 | 0.89566700 | -1.00727300 |
| C | -0.88084800 | 2.09775500 | -0.24238700 |

|   |             |             |             |
|---|-------------|-------------|-------------|
| C | -1.55213200 | 1.72201600  | 1.12091000  |
| N | -2.36718000 | 0.53416000  | 1.03623100  |
| H | -0.23820900 | 1.13404500  | -2.07423100 |
| H | -0.78196300 | 1.57317700  | 1.88048400  |
| H | -2.13220500 | 2.60301400  | 1.42484500  |
| H | -1.04772700 | 0.08402700  | -0.91840900 |
| C | -1.90900000 | -0.58012400 | 1.77248100  |
| C | -1.67303400 | -0.45155100 | 3.15083100  |
| C | -1.51431000 | -1.77631500 | 1.14931500  |
| C | -1.05365100 | -1.46810600 | 3.87349600  |
| H | -1.97529500 | 0.46498300  | 3.64942400  |
| C | -0.92414400 | -2.80506100 | 1.87986400  |
| H | -1.66652900 | -1.89248000 | 0.08088500  |
| C | -0.68022200 | -2.65418100 | 3.24396700  |
| H | -0.87538500 | -1.33591900 | 4.93621600  |
| H | -0.62907800 | -3.71839600 | 1.37047300  |
| H | -0.19978100 | -3.44804200 | 3.80603600  |
| C | 0.13010000  | 3.16869500  | 0.06639700  |
| O | 1.31761000  | 2.96770100  | 0.24459400  |
| O | -0.43842000 | 4.36021500  | 0.21690700  |
| C | 0.43656200  | 5.42154900  | 0.62660600  |
| H | 1.21987100  | 5.56825000  | -0.11827200 |
| H | -0.19039600 | 6.30641300  | 0.70369300  |
| H | 0.88948900  | 5.18330000  | 1.59018000  |
| H | -1.66667400 | 2.53350100  | -0.86606600 |
| P | 1.32080600  | 0.16978600  | -0.60882300 |
| C | 2.56245600  | 1.06672400  | -1.60853700 |
| C | 3.99571100  | 1.08211900  | -1.07891100 |
| H | 2.18901000  | 2.08900000  | -1.69011900 |
| H | 2.51690200  | 0.61477800  | -2.60681200 |
| C | 4.87526500  | 2.02667700  | -1.89815200 |
| H | 4.00131900  | 1.40188100  | -0.02930200 |
| H | 4.42276500  | 0.07343200  | -1.11370400 |
| C | 6.31818600  | 2.03676800  | -1.40267300 |
| H | 4.84325000  | 1.72573000  | -2.95207600 |
| H | 4.45395700  | 3.03776600  | -1.84688700 |
| H | 6.93374200  | 2.72208800  | -1.99027200 |
| H | 6.36825400  | 2.35083200  | -0.35555800 |
| H | 6.76229200  | 1.03921700  | -1.47474200 |
| C | 1.61020900  | 0.07484700  | 1.20095400  |
| C | 2.36755600  | -1.13892400 | 1.76372400  |
| H | 0.59366100  | 0.04717700  | 1.60615800  |
| H | 2.05757900  | 1.02287400  | 1.51235600  |
| C | 3.89011100  | -1.03716000 | 1.75363700  |

|   |             |             |             |
|---|-------------|-------------|-------------|
| H | 2.04254800  | -2.06160700 | 1.26631300  |
| H | 2.03517100  | -1.24528000 | 2.80291300  |
| C | 4.53493400  | -2.28211800 | 2.35654600  |
| H | 4.26355100  | -0.89616300 | 0.73450400  |
| H | 4.19120600  | -0.14435800 | 2.31502900  |
| H | 5.62363600  | -2.19524700 | 2.37845500  |
| H | 4.18626400  | -2.44512200 | 3.38090900  |
| H | 4.27877700  | -3.17201000 | 1.77148000  |
| C | 1.21670900  | -1.53165000 | -1.25906600 |
| C | 2.56215000  | -2.21417800 | -1.52763000 |
| H | 0.62881100  | -1.47885000 | -2.18301900 |
| H | 0.62551100  | -2.10409200 | -0.53464300 |
| C | 2.36913900  | -3.67907000 | -1.91874500 |
| H | 3.09122800  | -1.68887400 | -2.33173100 |
| H | 3.20647400  | -2.16643800 | -0.64184300 |
| C | 3.69662200  | -4.37633500 | -2.19912700 |
| H | 1.83987200  | -4.19555900 | -1.10857200 |
| H | 1.72123300  | -3.73328900 | -2.80167000 |
| H | 3.54303900  | -5.42167400 | -2.47739000 |
| H | 4.23092500  | -3.88380700 | -3.01715000 |
| H | 4.34198700  | -4.35378400 | -1.31529300 |
| C | -4.13430200 | -0.33742700 | -0.69472900 |
| C | -4.18925000 | -1.73154300 | -0.44059700 |
| C | -4.82025900 | 0.09366900  | -1.86577600 |
| C | -4.82488200 | -2.61404900 | -1.31048300 |
| H | -3.78034700 | -2.12681500 | 0.47957200  |
| C | -5.47282200 | -0.78808600 | -2.71033200 |
| H | -4.81813300 | 1.15366100  | -2.10540100 |
| C | -5.47155600 | -2.16395400 | -2.45790800 |
| H | -4.83493300 | -3.67299100 | -1.06376000 |
| H | -5.97213700 | -0.39918100 | -3.59436200 |
| H | -5.97079100 | -2.85594600 | -3.12775300 |
| C | -4.09280300 | 1.92896800  | 0.15447500  |
| N | -4.52805400 | 3.02406500  | 0.11820800  |

**M2 (SR)**

|   |             |             |             |
|---|-------------|-------------|-------------|
| C | -2.52199900 | 0.18273200  | -1.00132300 |
| C | 0.08337300  | -1.75411200 | -0.41944200 |
| C | -1.05240600 | -1.62244300 | 0.62825800  |
| C | -1.31980500 | -0.21503900 | 1.15254000  |
| N | -1.78394200 | 0.69359900  | 0.11271700  |
| H | 0.44420100  | -2.78866400 | -0.45100000 |
| H | -0.39884400 | 0.18067700  | 1.60154400  |
| H | -2.03974700 | -0.29385000 | 1.98299500  |

|   |             |             |             |
|---|-------------|-------------|-------------|
| H | -0.29968500 | -1.52104200 | -1.41884900 |
| C | -1.86342100 | 2.05003300  | 0.44597000  |
| C | -1.48399100 | 2.53470200  | 1.71265600  |
| C | -2.30537000 | 2.98700100  | -0.50952600 |
| C | -1.53236000 | 3.89976900  | 1.99448700  |
| H | -1.16888700 | 1.85816300  | 2.49729400  |
| C | -2.35037300 | 4.34071100  | -0.21087300 |
| H | -2.61464600 | 2.62960700  | -1.48459500 |
| C | -1.96094800 | 4.81674100  | 1.04263300  |
| H | -1.23492900 | 4.23930400  | 2.98232900  |
| H | -2.69558700 | 5.03526100  | -0.97136900 |
| H | -1.99754900 | 5.87665600  | 1.26954300  |
| C | -0.77116900 | -2.54398000 | 1.80752000  |
| O | -0.31178900 | -2.15092300 | 2.85608100  |
| O | -0.99397300 | -3.85686500 | 1.66133900  |
| C | -1.75737200 | -4.37661900 | 0.56588300  |
| H | -2.77521700 | -3.98169700 | 0.58228000  |
| H | -1.78307700 | -5.45334200 | 0.72011400  |
| H | -1.28707600 | -4.16336400 | -0.39627600 |
| H | -1.96083400 | -1.95842800 | 0.12162400  |
| P | 1.61214900  | -0.75185700 | -0.26643200 |
| C | 2.34143300  | -1.05880800 | 1.37448400  |
| C | 3.42112400  | -0.08353300 | 1.85046200  |
| H | 1.50496200  | -1.05955200 | 2.08182100  |
| H | 2.72107500  | -2.08815700 | 1.33994800  |
| C | 3.89113000  | -0.43668300 | 3.26204100  |
| H | 3.02120600  | 0.93772600  | 1.84939400  |
| H | 4.28265700  | -0.09392800 | 1.17367400  |
| C | 4.95040000  | 0.53783200  | 3.76799500  |
| H | 4.29021800  | -1.45780200 | 3.26249500  |
| H | 3.02769500  | -0.43650000 | 3.93772500  |
| H | 5.27972800  | 0.27465000  | 4.77594500  |
| H | 4.55810700  | 1.55893100  | 3.79709000  |
| H | 5.82816800  | 0.53451200  | 3.11462300  |
| C | 1.24267100  | 1.00879700  | -0.61558800 |
| C | 2.26427300  | 1.80985700  | -1.43937400 |
| H | 0.30041200  | 0.95576400  | -1.16929800 |
| H | 1.01668500  | 1.50819900  | 0.33506300  |
| C | 3.41962400  | 2.42756300  | -0.65585800 |
| H | 2.65048800  | 1.20159600  | -2.26676300 |
| H | 1.70147300  | 2.62119900  | -1.91405500 |
| C | 4.37037800  | 3.18845600  | -1.57543700 |
| H | 3.97987900  | 1.65708900  | -0.11620500 |
| H | 3.01168300  | 3.09979800  | 0.10865800  |

|   |             |             |             |
|---|-------------|-------------|-------------|
| H | 5.18094500  | 3.65564000  | -1.01165700 |
| H | 3.83985700  | 3.97419500  | -2.12181700 |
| H | 4.81722500  | 2.51277600  | -2.31294200 |
| C | 2.67443800  | -1.42696500 | -1.58453700 |
| C | 4.16806000  | -1.10740000 | -1.46253700 |
| H | 2.52337800  | -2.51208000 | -1.57683100 |
| H | 2.26216400  | -1.05504300 | -2.53084900 |
| C | 4.93714900  | -1.57196000 | -2.69881900 |
| H | 4.57422900  | -1.60096600 | -0.57154500 |
| H | 4.32723200  | -0.03153500 | -1.33016000 |
| C | 6.42864900  | -1.27246700 | -2.58447100 |
| H | 4.52232300  | -1.07355300 | -3.58332200 |
| H | 4.77805000  | -2.64742500 | -2.84023700 |
| H | 6.96776800  | -1.60100300 | -3.47605400 |
| H | 6.86406100  | -1.78151400 | -1.71927800 |
| H | 6.60048500  | -0.19830600 | -2.46262900 |
| C | -3.89617600 | -0.21680400 | -0.85655000 |
| C | -4.58453500 | -0.03639000 | 0.36669200  |
| C | -4.62218200 | -0.82499700 | -1.91088800 |
| C | -5.90481800 | -0.44502300 | 0.52059500  |
| H | -4.07397100 | 0.44855600  | 1.19442400  |
| C | -5.93887100 | -1.22587400 | -1.74516300 |
| H | -4.12846900 | -0.97999900 | -2.86731500 |
| C | -6.60110300 | -1.04607600 | -0.52708200 |
| H | -6.39710800 | -0.28650100 | 1.47678700  |
| H | -6.45847600 | -1.69052300 | -2.57935200 |
| H | -7.63027200 | -1.36481600 | -0.40151900 |
| C | -1.84213100 | 0.09579800  | -2.21428400 |
| N | -1.21179700 | 0.02219200  | -3.20659100 |

**TS3 (SR)**

|   |            |             |             |
|---|------------|-------------|-------------|
| C | 2.51792100 | 0.59888200  | -0.51672800 |
| C | 0.48031000 | -0.24025500 | -0.34621800 |
| C | 1.03337800 | -1.21000000 | 0.69034400  |
| C | 2.44111300 | -1.66855500 | 0.29080500  |
| N | 3.24325200 | -0.47698200 | 0.09201900  |
| H | 0.24503700 | 0.78279100  | -0.08311300 |
| H | 2.38538900 | -2.28897000 | -0.61716700 |
| H | 2.86167700 | -2.28541200 | 1.09226400  |
| H | 0.48630200 | -0.51622900 | -1.39504600 |
| C | 4.62089500 | -0.60946400 | -0.11763200 |
| C | 5.26984600 | -1.85121300 | -0.01019800 |
| C | 5.39876000 | 0.52130400  | -0.43151600 |
| C | 6.64719700 | -1.94752300 | -0.19498400 |

|   |             |             |             |
|---|-------------|-------------|-------------|
| H | 4.70772900  | -2.75163400 | 0.20555900  |
| C | 6.77001500  | 0.40770200  | -0.61529000 |
| H | 4.91888200  | 1.48945400  | -0.52451300 |
| C | 7.41142800  | -0.82550900 | -0.49749700 |
| H | 7.12032500  | -2.92106000 | -0.10706000 |
| H | 7.34377700  | 1.29787800  | -0.85530500 |
| H | 8.48280600  | -0.90833900 | -0.64426400 |
| C | 0.14759300  | -2.42276100 | 0.92340300  |
| O | -0.57174600 | -2.57408200 | 1.88581800  |
| O | 0.25896700  | -3.32542300 | -0.05562300 |
| C | -0.42456100 | -4.56935400 | 0.16025900  |
| H | -0.04843800 | -5.04360300 | 1.06808900  |
| H | -0.20481100 | -5.17968800 | -0.71241900 |
| H | -1.49887400 | -4.40735200 | 0.25574600  |
| H | 1.08709700  | -0.68769600 | 1.65026900  |
| P | -1.84349600 | -0.46312800 | -0.23283800 |
| C | -2.28247600 | 0.24602100  | 1.41276500  |
| C | -3.73407600 | 0.22894400  | 1.89097900  |
| H | -1.66236800 | -0.31058200 | 2.12603800  |
| H | -1.89516400 | 1.27386300  | 1.39591800  |
| C | -3.86492700 | 0.79160900  | 3.30712000  |
| H | -4.11543500 | -0.79971000 | 1.87808900  |
| H | -4.36901600 | 0.81091800  | 1.21355600  |
| C | -5.30718300 | 0.76558900  | 3.80504600  |
| H | -3.48288200 | 1.81959600  | 3.32279600  |
| H | -3.22591300 | 0.21117500  | 3.98364600  |
| H | -5.38725700 | 1.16692000  | 4.81842200  |
| H | -5.69658700 | -0.25726400 | 3.81569400  |
| H | -5.95457500 | 1.36214000  | 3.15477800  |
| C | -2.80421400 | -2.01194000 | -0.58054100 |
| C | -4.09166800 | -1.94515700 | -1.41631600 |
| H | -2.07624700 | -2.64005800 | -1.10590700 |
| H | -2.98247000 | -2.49167900 | 0.39007000  |
| C | -5.36009300 | -1.60020600 | -0.64108800 |
| H | -3.96389200 | -1.24381100 | -2.25079100 |
| H | -4.23163000 | -2.93003700 | -1.87832600 |
| C | -6.58167800 | -1.54688200 | -1.55452100 |
| H | -5.24462300 | -0.63825300 | -0.13281800 |
| H | -5.51028800 | -2.34772700 | 0.14785900  |
| H | -7.49129000 | -1.32133000 | -0.99272600 |
| H | -6.72858700 | -2.50224200 | -2.06789200 |
| H | -6.45805800 | -0.77331000 | -2.32025500 |
| C | -2.25661600 | 0.77826100  | -1.52615600 |
| C | -3.56815900 | 1.55781900  | -1.41497800 |

|   |             |            |             |
|---|-------------|------------|-------------|
| H | -1.41581900 | 1.48628800 | -1.53021600 |
| H | -2.20353500 | 0.24574000 | -2.48447900 |
| C | -3.73857500 | 2.54597700 | -2.56892100 |
| H | -3.59023400 | 2.10600900 | -0.46487500 |
| H | -4.42309500 | 0.87159400 | -1.40456700 |
| C | -5.04867700 | 3.32234800 | -2.47204300 |
| H | -3.69947500 | 1.99791900 | -3.51837100 |
| H | -2.89030700 | 3.24123400 | -2.57523700 |
| H | -5.15775900 | 4.02746600 | -3.29978500 |
| H | -5.09687300 | 3.88960400 | -1.53729900 |
| H | -5.90600600 | 2.64195300 | -2.49347000 |
| C | 2.38721500  | 1.86169700 | 0.21986100  |
| C | 2.74787900  | 1.94721100 | 1.57562300  |
| C | 1.79592200  | 2.99024300 | -0.37862300 |
| C | 2.53696000  | 3.11843300 | 2.29590100  |
| H | 3.20499500  | 1.08356800 | 2.04920300  |
| C | 1.58678300  | 4.15682000 | 0.34835100  |
| H | 1.50630300  | 2.94667000 | -1.42606700 |
| C | 1.95574100  | 4.23230500 | 1.69109700  |
| H | 2.83212900  | 3.16118100 | 3.34036400  |
| H | 1.13117700  | 5.01391900 | -0.13878600 |
| H | 1.79210600  | 5.14414400 | 2.25571900  |
| C | 2.60506600  | 0.67465200 | -1.93877200 |
| N | 2.60156800  | 0.69625900 | -3.10480500 |

**M2 (SS)**

|   |             |             |             |
|---|-------------|-------------|-------------|
| C | -2.66505700 | -0.62058400 | -1.28097800 |
| C | -2.86271800 | -0.26500400 | -2.61677700 |
| C | 0.24885300  | 0.79751900  | -1.68708700 |
| C | -0.85987200 | 1.65666400  | -1.06888800 |
| C | -1.63044200 | 1.07711200  | 0.14113300  |
| N | -2.84436700 | 0.39272800  | -0.28475100 |
| H | 0.66999800  | 1.34413700  | -2.53424200 |
| H | -1.90090400 | 1.90790600  | 0.79338700  |
| H | -0.98021500 | 0.39975800  | 0.72482700  |
| N | -3.01301900 | 0.03098800  | -3.74446300 |
| H | -0.18482700 | -0.13558500 | -2.06419500 |
| C | -3.92785400 | 0.31327900  | 0.59843900  |
| C | -3.88730000 | 0.82239800  | 1.90909800  |
| C | -5.12460000 | -0.29335000 | 0.16925400  |
| C | -5.01002200 | 0.75591100  | 2.73337900  |
| H | -2.97777000 | 1.25142800  | 2.31159000  |
| C | -6.23215000 | -0.35501000 | 1.00172700  |
| H | -5.16167200 | -0.70935200 | -0.83138800 |

|   |             |             |             |
|---|-------------|-------------|-------------|
| C | -6.19304700 | 0.17435800  | 2.29319300  |
| H | -4.94260500 | 1.15853000  | 3.73994700  |
| H | -7.14160400 | -0.82176700 | 0.63408900  |
| H | -7.06201400 | 0.12484700  | 2.94027200  |
| C | -2.07505400 | -1.88108500 | -0.92394000 |
| C | -1.53779000 | -2.76792000 | -1.89351500 |
| C | -1.96353700 | -2.28496200 | 0.43160500  |
| C | -0.90934800 | -3.94856800 | -1.52784700 |
| H | -1.60590500 | -2.49660000 | -2.94443400 |
| C | -1.33896100 | -3.47786300 | 0.78267200  |
| H | -2.37623800 | -1.64907400 | 1.20978500  |
| C | -0.78929400 | -4.31934600 | -0.18437100 |
| H | -0.49719400 | -4.58966200 | -2.30303100 |
| H | -1.28123100 | -3.75232300 | 1.83338100  |
| H | -0.29594000 | -5.24362600 | 0.09632000  |
| C | -0.35241600 | 3.07620800  | -0.86093600 |
| O | 0.73147300  | 3.47399700  | -1.23508600 |
| O | -1.25776500 | 3.86011300  | -0.28213900 |
| C | -0.87476600 | 5.23280600  | -0.11710800 |
| H | 0.02862700  | 5.29782300  | 0.49102100  |
| H | -1.71156600 | 5.71428800  | 0.38277000  |
| H | -0.69214400 | 5.68933100  | -1.09094300 |
| P | 1.69528100  | 0.27281600  | -0.67175600 |
| C | 1.86293900  | 1.34825300  | 0.79906600  |
| C | 3.11288400  | 1.20382900  | 1.68632500  |
| H | 1.80690000  | 2.37089400  | 0.41668500  |
| H | 0.94732500  | 1.17368800  | 1.37456300  |
| C | 4.24763700  | 2.13692900  | 1.26381400  |
| H | 3.46624500  | 0.16816700  | 1.72848900  |
| H | 2.81754900  | 1.45130400  | 2.71194400  |
| C | 5.50682500  | 1.92104900  | 2.09603000  |
| H | 3.90303000  | 3.17254700  | 1.36527200  |
| H | 4.47694100  | 1.99438100  | 0.20190700  |
| H | 6.29607500  | 2.61934100  | 1.80788300  |
| H | 5.89344600  | 0.90415400  | 1.96813700  |
| H | 5.29808400  | 2.06604300  | 3.16043100  |
| C | 3.10792200  | 0.35168000  | -1.84438400 |
| C | 4.20070800  | -0.72353600 | -1.74198500 |
| H | 2.61841600  | 0.25769900  | -2.81957500 |
| H | 3.52192800  | 1.36516000  | -1.80111100 |
| C | 5.27012400  | -0.48944200 | -0.67985100 |
| H | 4.69085100  | -0.76553500 | -2.72086500 |
| H | 3.74306800  | -1.71052300 | -1.60059300 |
| C | 6.27125600  | -1.63929800 | -0.62213100 |



|   |             |             |             |
|---|-------------|-------------|-------------|
| H | 4.80785600  | -0.36591300 | 0.30568700  |
| H | 5.79156700  | 0.45163400  | -0.89330700 |
| H | 7.04670500  | -1.45067000 | 0.12411900  |
| H | 6.75962300  | -1.78016400 | -1.59111800 |
| H | 5.77041200  | -2.57705300 | -0.36025400 |
| C | 1.37299500  | -1.46989300 | -0.25065200 |
| C | 2.23541700  | -2.14052500 | 0.82588800  |
| H | 0.31647300  | -1.52232000 | 0.03676000  |
| H | 1.43990700  | -1.99289900 | -1.21281400 |
| C | 1.71726300  | -1.89307400 | 2.24344200  |
| H | 3.28782100  | -1.84089200 | 0.74690400  |
| H | 2.21498900  | -3.21862400 | 0.63082600  |
| C | 2.67039500  | -2.43867800 | 3.30137900  |
| H | 0.73160600  | -2.36312600 | 2.33510300  |
| H | 1.55688300  | -0.82171100 | 2.41215900  |
| H | 2.27174000  | -2.29690100 | 4.30852300  |
| H | 3.64103300  | -1.93328900 | 3.24735200  |
| H | 2.84452000  | -3.50887100 | 3.15281000  |
| H | -1.61090400 | 1.77315700  | -1.86242000 |

#### TS3 (SS)

|   |             |             |             |
|---|-------------|-------------|-------------|
| C | -2.38033500 | -0.22249300 | 1.01346700  |
| C | -2.38020000 | -0.76908800 | 2.32952900  |
| C | -0.30343400 | -0.54942700 | 0.38942700  |
| C | -0.73448300 | -1.89743600 | -0.16978900 |
| C | -2.07958700 | -1.73251000 | -0.88484200 |
| N | -2.98665900 | -1.04006000 | 0.01406800  |
| H | -0.46519800 | 0.32968500  | -0.21911300 |
| H | -1.92101500 | -1.18508000 | -1.82693500 |
| H | -2.47792700 | -2.72063200 | -1.14236200 |
| N | -2.27678400 | -1.23781700 | 3.39294500  |
| H | -0.07509900 | -0.41607300 | 1.44073600  |
| C | -4.34712500 | -0.98177100 | -0.26801100 |
| C | -4.87769400 | -1.54646100 | -1.44261800 |
| C | -5.23468800 | -0.34752000 | 0.62310600  |
| C | -6.24612800 | -1.49475700 | -1.69534400 |
| H | -4.22580900 | -2.01654400 | -2.16943200 |
| C | -6.59550700 | -0.30336300 | 0.35309900  |
| H | -4.84612100 | 0.10727400  | 1.52758800  |
| C | -7.11948900 | -0.87807700 | -0.80500600 |
| H | -6.62679900 | -1.93938100 | -2.61019300 |
| H | -7.25578100 | 0.18854300  | 1.06138900  |
| H | -8.18373900 | -0.83954300 | -1.00973000 |
| C | -2.36278100 | 1.23778400  | 0.87913300  |

|   |             |             |             |
|---|-------------|-------------|-------------|
| C | -2.73505300 | 1.85674300  | -0.32722700 |
| C | -1.81655300 | 2.04602600  | 1.89395900  |
| C | -2.57506300 | 3.22863200  | -0.50238100 |
| H | -3.15031100 | 1.25254500  | -1.12915200 |
| C | -1.65171700 | 3.41391900  | 1.70845200  |
| H | -1.51447500 | 1.58878400  | 2.83334200  |
| C | -2.03126800 | 4.01855000  | 0.50967200  |
| H | -2.87587200 | 3.68374500  | -1.44197600 |
| H | -1.22321800 | 4.01278200  | 2.50709400  |
| H | -1.90363000 | 5.08678700  | 0.36683800  |
| C | 0.26885300  | -2.47233900 | -1.15530300 |
| O | 0.29932300  | -2.21631800 | -2.33688100 |
| O | 1.12537500  | -3.30703500 | -0.55534700 |
| C | 2.06556800  | -3.96818500 | -1.41500400 |
| H | 2.51309400  | -3.26055300 | -2.11312700 |
| H | 2.81902100  | -4.39657300 | -0.75748100 |
| H | 1.55661800  | -4.75467300 | -1.97532300 |
| P | 1.95732600  | -0.26897000 | 0.12507100  |
| C | 2.77060000  | -1.14039300 | 1.52639100  |
| C | 4.25018400  | -0.84083500 | 1.77416700  |
| H | 2.62332400  | -2.21092700 | 1.33767900  |
| H | 2.18014700  | -0.89704700 | 2.41905500  |
| C | 4.78204300  | -1.58230700 | 3.00108600  |
| H | 4.83933200  | -1.13506000 | 0.89636900  |
| H | 4.40204700  | 0.23741000  | 1.91169700  |
| C | 6.26180300  | -1.30315700 | 3.24819900  |
| H | 4.19506900  | -1.28939200 | 3.87986700  |
| H | 4.62281900  | -2.65894900 | 2.86519900  |
| H | 6.62762000  | -1.84210300 | 4.12572800  |
| H | 6.86504100  | -1.60996900 | 2.38812000  |
| H | 6.43460200  | -0.23504800 | 3.41267700  |
| C | 3.09087800  | -0.45638500 | -1.32966700 |
| C | 4.21335600  | 0.57896000  | -1.46550500 |
| H | 2.46942500  | -0.46457500 | -2.23207700 |
| H | 3.51949000  | -1.46261400 | -1.23743400 |
| C | 5.13028500  | 0.26541400  | -2.64833700 |
| H | 3.78465400  | 1.57941200  | -1.60054800 |
| H | 4.81022400  | 0.61845700  | -0.54682700 |
| C | 6.23426500  | 1.30687500  | -2.80956600 |
| H | 5.57242200  | -0.72838600 | -2.50723500 |
| H | 4.52979000  | 0.21298800  | -3.56458500 |
| H | 6.88135800  | 1.07232200  | -3.65836500 |
| H | 5.80941600  | 2.30198000  | -2.97365700 |
| H | 6.85873000  | 1.35408000  | -1.91206000 |

|   |              |              |              |
|---|--------------|--------------|--------------|
| C | 1. 98119900  | 1. 51729600  | 0. 56577000  |
| C | 1. 30459300  | 2. 40423600  | -0. 48955000 |
| H | 3. 01795600  | 1. 83442400  | 0. 72584400  |
| H | 1. 46239500  | 1. 61919800  | 1. 52771400  |
| C | 1. 59814800  | 3. 88724700  | -0. 26735700 |
| H | 1. 63484600  | 2. 11871200  | -1. 49790200 |
| H | 0. 21641600  | 2. 26250900  | -0. 46152700 |
| C | 1. 01336900  | 4. 75953800  | -1. 37396900 |
| H | 1. 18496400  | 4. 18631600  | 0. 70431500  |
| H | 2. 68404200  | 4. 03673500  | -0. 20973400 |
| H | 1. 19582200  | 5. 82061400  | -1. 18487400 |
| H | 1. 45838400  | 4. 50802200  | -2. 34206500 |
| H | -0. 06775300 | 4. 60887800  | -1. 45197800 |
| H | -0. 83392200 | -2. 60086400 | 0. 66121800  |

P (SR)

|   |              |              |              |
|---|--------------|--------------|--------------|
| C | -0. 08926100 | 0. 41654900  | 0. 86123300  |
| C | -0. 74202100 | 0. 33272600  | 2. 19474300  |
| C | 1. 44898900  | 0. 45018400  | 1. 07492200  |
| C | 1. 97843000  | -0. 24198600 | -0. 18433000 |
| C | 0. 97757700  | -1. 38950300 | -0. 35799200 |
| N | -0. 27584300 | -0. 81540000 | 0. 11663900  |
| H | 1. 81286100  | 1. 46887300  | 1. 21163100  |
| H | 0. 88650200  | -1. 69656300 | -1. 40462300 |
| H | 1. 28467400  | -2. 25845000 | 0. 23993400  |
| N | -1. 22788700 | 0. 26753900  | 3. 24148700  |
| H | 1. 71494500  | -0. 15319200 | 1. 94770400  |
| C | -1. 50707700 | -1. 41612300 | -0. 11224200 |
| C | -1. 56354600 | -2. 71003600 | -0. 65961300 |
| C | -2. 71636700 | -0. 76088200 | 0. 18385800  |
| C | -2. 78947500 | -3. 31828100 | -0. 90549100 |
| H | -0. 64985200 | -3. 24815900 | -0. 88350700 |
| C | -3. 93228200 | -1. 38915400 | -0. 06117400 |
| H | -2. 71357700 | 0. 24447800  | 0. 58909100  |
| C | -3. 98468300 | -2. 66855000 | -0. 60882000 |
| H | -2. 80353600 | -4. 31817600 | -1. 32829500 |
| H | -4. 85031800 | -0. 86060200 | 0. 17626200  |
| H | -4. 93790200 | -3. 14914400 | -0. 79906500 |
| C | -0. 56794000 | 1. 67268400  | 0. 12012400  |
| C | -0. 75875100 | 1. 63486200  | -1. 26018600 |
| C | -0. 74818100 | 2. 87259200  | 0. 81082700  |
| C | -1. 12448100 | 2. 79180000  | -1. 94554800 |
| H | -0. 63344700 | 0. 69749900  | -1. 79395300 |
| C | -1. 11347900 | 4. 02643400  | 0. 12397200  |

|   |             |             |             |
|---|-------------|-------------|-------------|
| H | -0.60545300 | 2.90690600  | 1.88805600  |
| C | -1.30242900 | 3.98809900  | -1.25650800 |
| H | -1.27527100 | 2.75386000  | -3.01938600 |
| H | -1.25354700 | 4.95468400  | 0.66798600  |
| H | -1.59069600 | 4.88697500  | -1.79140600 |
| C | 3.39089900  | -0.74402500 | 0.01696900  |
| O | 3.71183300  | -1.51918500 | 0.88895000  |
| O | 4.24022700  | -0.22972300 | -0.87126300 |
| C | 5.60444400  | -0.64813700 | -0.73217100 |
| H | 5.67836000  | -1.73171300 | -0.83637000 |
| H | 6.14970100  | -0.14800700 | -1.52897300 |
| H | 5.99030300  | -0.35039100 | 0.24408900  |
| H | 1.94368000  | 0.43191500  | -1.04300000 |

P(SS)

|   |             |             |             |
|---|-------------|-------------|-------------|
| C | -0.01343200 | 0.55003500  | 0.56917500  |
| C | -0.18360300 | 0.39070100  | 2.04662200  |
| C | 1.44362200  | 0.98405900  | 0.29030600  |
| C | 2.21910300  | -0.33730900 | 0.35980000  |
| C | 1.25408500  | -1.32370500 | -0.30666400 |
| N | -0.07467300 | -0.74502800 | -0.08292600 |
| H | 1.79023400  | 1.74693000  | 0.98890000  |
| H | 1.47204300  | -1.40442400 | -1.37799400 |
| H | 1.32509400  | -2.31973800 | 0.14165000  |
| N | -0.28059100 | 0.23023900  | 3.18763600  |
| H | 1.47789800  | 1.38125600  | -0.72856100 |
| C | -1.21194500 | -1.55182400 | -0.08140900 |
| C | -1.17359400 | -2.79586000 | -0.73507600 |
| C | -2.41009800 | -1.15929300 | 0.53998000  |
| C | -2.29405100 | -3.61840700 | -0.75493100 |
| H | -0.27061100 | -3.11464000 | -1.24325900 |
| C | -3.52226600 | -1.99434100 | 0.50792600  |
| H | -2.48435900 | -0.20597900 | 1.04945300  |
| C | -3.47818800 | -3.22873500 | -0.13428800 |
| H | -2.23531900 | -4.57355400 | -1.26767000 |
| H | -4.43418400 | -1.66866600 | 0.99886200  |
| H | -4.35018500 | -3.87302300 | -0.15173600 |
| C | -0.99562600 | 1.58300600  | 0.01814600  |
| C | -1.34820400 | 1.52839000  | -1.33122200 |
| C | -1.47933100 | 2.61580600  | 0.81957300  |
| C | -2.18313100 | 2.50109900  | -1.87151200 |
| H | -0.97271200 | 0.71736500  | -1.94805100 |
| C | -2.31360100 | 3.58980100  | 0.27410200  |
| H | -1.21169400 | 2.66224000  | 1.87158000  |

|   |             |             |             |
|---|-------------|-------------|-------------|
| C | -2.66836400 | 3.53364400  | -1.07044800 |
| H | -2.45926800 | 2.44972300  | -2.91966400 |
| H | -2.68704400 | 4.38955200  | 0.90503700  |
| H | -3.32331100 | 4.28854000  | -1.49281700 |
| C | 3.53856700  | -0.22839900 | -0.37142100 |
| O | 3.64579800  | -0.18349500 | -1.57561200 |
| O | 4.56932100  | -0.14904200 | 0.47025600  |
| C | 5.85473700  | 0.00597500  | -0.14540200 |
| H | 5.87772700  | 0.91770200  | -0.74424000 |
| H | 6.56985600  | 0.06505600  | 0.67166100  |
| H | 6.07122300  | -0.85167000 | -0.78434800 |
| H | 2.40244000  | -0.61070000 | 1.40154100  |

React-(S)

|   |             |             |             |
|---|-------------|-------------|-------------|
| C | 0.53515400  | -0.96477600 | 0.72277600  |
| C | 0.68236500  | -0.87193400 | 2.20504400  |
| C | -1.85472400 | -1.27851400 | -1.66688700 |
| C | -2.38800300 | -0.83194100 | -0.53179500 |
| C | -1.65760600 | 0.04778500  | 0.46518700  |
| N | -0.22823000 | 0.14509200  | 0.19152400  |
| H | -2.41682500 | -1.93090200 | -2.32608300 |
| H | -1.82446900 | -0.35010300 | 1.47922200  |
| H | -2.07522300 | 1.05620000  | 0.47563300  |
| N | 0.75121100  | -0.78169000 | 3.35553600  |
| H | -0.84737500 | -0.99729300 | -1.95470100 |
| C | 0.34593400  | 1.43866700  | 0.12653200  |
| C | -0.28175700 | 2.40054500  | -0.67832500 |
| C | 1.52855800  | 1.78125300  | 0.79104100  |
| C | 0.24258200  | 3.68208900  | -0.78676800 |
| H | -1.17205600 | 2.12786000  | -1.23845700 |
| C | 2.05449600  | 3.06559000  | 0.66241900  |
| H | 2.04991300  | 1.05858400  | 1.40828600  |
| C | 1.41613900  | 4.02464700  | -0.11640600 |
| H | -0.26066500 | 4.41071100  | -1.41422800 |
| H | 2.97152400  | 3.31245800  | 1.18773600  |
| H | 1.83032100  | 5.02270900  | -0.20852800 |
| C | 1.87437600  | -1.20472700 | 0.03105000  |
| C | 2.89683000  | -1.88819700 | 0.68950800  |
| C | 2.05624800  | -0.80242300 | -1.29248800 |
| C | 4.08986700  | -2.17044300 | 0.02857900  |
| H | 2.76648100  | -2.20072200 | 1.72185300  |
| C | 3.25046800  | -1.08464000 | -1.94978300 |
| H | 1.27344600  | -0.25001100 | -1.80151300 |
| C | 4.26984400  | -1.76967800 | -1.29240300 |

|   |             |             |             |
|---|-------------|-------------|-------------|
| H | 4.87925500  | -2.70072100 | 0.55083800  |
| H | 3.38474000  | -0.76180800 | -2.97694600 |
| H | 5.20103100  | -1.98541800 | -1.80567600 |
| C | -3.76630100 | -1.30542700 | -0.15796200 |
| O | -4.05345000 | -2.47676100 | -0.09714900 |
| O | -4.70084300 | -0.39231100 | 0.15220400  |
| C | -4.56704800 | 0.97885000  | -0.23571200 |
| H | -3.86957000 | 1.09197100  | -1.06860300 |
| H | -4.24450600 | 1.57752200  | 0.61836200  |
| H | -5.55684200 | 1.30638900  | -0.55139700 |
| H | -0.08023600 | -1.85902500 | 0.55270000  |

TS1 (S)

|   |             |             |             |
|---|-------------|-------------|-------------|
| C | -3.34614600 | 0.83580900  | -0.34346500 |
| C | -3.63300200 | 2.24197900  | 0.02264800  |
| C | -0.16318100 | 1.16915400  | -1.19527500 |
| C | -0.59542300 | 1.85523500  | -0.06791900 |
| C | -1.32621300 | 1.16654500  | 1.05633900  |
| N | -2.42001200 | 0.26512400  | 0.62431800  |
| H | 0.17637000  | 1.73371600  | -2.05636400 |
| H | -0.65379200 | 0.55215300  | 1.66698300  |
| H | -1.73729000 | 1.93306700  | 1.71897200  |
| N | -3.91963000 | 3.33148900  | 0.28134000  |
| H | -0.62294600 | 0.21208400  | -1.43229800 |
| C | -2.09267000 | -1.10322600 | 0.44673200  |
| C | -2.28122000 | -1.78832900 | -0.76132900 |
| C | -1.58559700 | -1.81468200 | 1.54499600  |
| C | -1.94889600 | -3.13812100 | -0.86829000 |
| H | -2.68858200 | -1.27826000 | -1.62811700 |
| C | -1.24152600 | -3.15505300 | 1.42626400  |
| H | -1.47670100 | -1.30757800 | 2.49881300  |
| C | -1.41975600 | -3.82822500 | 0.21744000  |
| H | -2.10389800 | -3.64598700 | -1.81503500 |
| H | -0.84755400 | -3.68188400 | 2.29007200  |
| H | -1.16010700 | -4.87794700 | 0.12951600  |
| C | -4.68024800 | 0.09398600  | -0.37855300 |
| C | -5.25203900 | -0.36864700 | 0.80670200  |
| C | -5.34736900 | -0.08451200 | -1.58855500 |
| C | -6.48333000 | -1.01540900 | 0.77757600  |
| H | -4.71850900 | -0.22901700 | 1.74212300  |
| C | -6.58124100 | -0.73127600 | -1.61593900 |
| H | -4.89944300 | 0.27555800  | -2.51155900 |
| C | -7.15000800 | -1.19804900 | -0.43363700 |
| H | -6.92271600 | -1.37925000 | 1.70073700  |

|   |             |             |             |
|---|-------------|-------------|-------------|
| H | -7.09328300 | -0.87395000 | -2.56187000 |
| H | -8.10872200 | -1.70597100 | -0.45553300 |
| C | -0.20524100 | 3.22616000  | 0.15725200  |
| O | -0.52308000 | 3.92363400  | 1.11491500  |
| O | 0.60988800  | 3.71611200  | -0.82193900 |
| C | 1.03916800  | 5.05856700  | -0.62942300 |
| H | 1.59936900  | 5.15494500  | 0.30400300  |
| H | 1.67901400  | 5.29545900  | -1.47848900 |
| H | 0.18706800  | 5.74147700  | -0.59800900 |
| P | 1.93209100  | 0.16577400  | -0.78291800 |
| C | 2.61678300  | 1.24160000  | 0.54116200  |
| C | 3.49402900  | 0.61017000  | 1.62362200  |
| H | 1.73635800  | 1.70542200  | 1.00994400  |
| H | 3.15012100  | 2.05368600  | 0.03032000  |
| C | 3.95846700  | 1.64044800  | 2.65358800  |
| H | 2.93432500  | -0.18177200 | 2.13811900  |
| H | 4.37147400  | 0.13121300  | 1.17426800  |
| C | 4.82825200  | 1.01799700  | 3.74183900  |
| H | 4.51542900  | 2.43410300  | 2.14032100  |
| H | 3.08061800  | 2.11935100  | 3.10472500  |
| H | 5.15982700  | 1.76606300  | 4.46644100  |
| H | 4.27815900  | 0.24323600  | 4.28515900  |
| H | 5.71859700  | 0.55162100  | 3.30827300  |
| C | 1.60094000  | -1.48668200 | -0.02526400 |
| C | 2.75838100  | -2.47846800 | 0.11115100  |
| H | 0.79830000  | -1.93995400 | -0.62410600 |
| H | 1.14939900  | -1.28659600 | 0.95577600  |
| C | 2.29195700  | -3.81517300 | 0.68782300  |
| H | 3.21690700  | -2.65293800 | -0.87114900 |
| H | 3.54286100  | -2.06209000 | 0.75420400  |
| C | 3.43463700  | -4.81698700 | 0.82695000  |
| H | 1.82495200  | -3.63988400 | 1.66530200  |
| H | 1.50475400  | -4.22668500 | 0.04411800  |
| H | 3.08453400  | -5.76897200 | 1.23423000  |
| H | 3.89785100  | -5.01639300 | -0.14460100 |
| H | 4.21237800  | -4.43109500 | 1.49347600  |
| C | 3.27248800  | -0.05839400 | -2.04177900 |
| C | 4.72385900  | -0.12880300 | -1.55784300 |
| H | 3.16582000  | 0.77910000  | -2.74174200 |
| H | 3.00900800  | -0.96097400 | -2.60709300 |
| C | 5.70243200  | -0.31173200 | -2.71831200 |
| H | 4.97583600  | 0.79280300  | -1.01746600 |
| H | 4.85088700  | -0.95299000 | -0.84684700 |
| C | 7.15303600  | -0.36588700 | -2.24725100 |

|   |             |             |             |
|---|-------------|-------------|-------------|
| H | 5.45118800  | -1.23364800 | -3.25723300 |
| H | 5.57260000  | 0.51059100  | -3.43270400 |
| H | 7.84130700  | -0.49745100 | -3.08599200 |
| H | 7.42832100  | 0.55708300  | -1.72738700 |
| H | 7.30605600  | -1.19755100 | -1.55234900 |
| H | -2.93241500 | 0.88524800  | -1.36509200 |

**M1 (S)**

|   |             |             |             |
|---|-------------|-------------|-------------|
| C | -3.31882100 | -0.79647600 | -0.26645500 |
| C | -3.97852000 | -1.25854100 | -1.52106200 |
| C | 0.43537900  | -0.60312700 | 0.86420400  |
| C | -0.32594700 | -1.19021900 | -0.28261100 |
| C | -1.11200700 | -0.28087900 | -1.15894100 |
| N | -2.35194200 | 0.25465400  | -0.50246700 |
| H | 0.01488400  | 0.36069500  | 1.18709600  |
| H | -0.54644200 | 0.59716800  | -1.47975100 |
| H | -1.40712000 | -0.82228400 | -2.06918400 |
| N | -4.45835800 | -1.61078000 | -2.51289800 |
| H | 0.45826800  | -1.25906500 | 1.74208800  |
| C | -2.81005100 | 1.53230300  | -0.88941500 |
| C | -1.90677500 | 2.60944200  | -0.84506000 |
| C | -4.13314600 | 1.80202500  | -1.26858000 |
| C | -2.30118700 | 3.89192200  | -1.19921200 |
| H | -0.89168100 | 2.43744800  | -0.50075000 |
| C | -4.52509700 | 3.09671300  | -1.60676400 |
| H | -4.87114900 | 1.00968000  | -1.30382700 |
| C | -3.61665800 | 4.14848500  | -1.58639300 |
| H | -1.57795100 | 4.70045600  | -1.15431000 |
| H | -5.55663200 | 3.27403900  | -1.89563300 |
| H | -3.92675300 | 5.15212800  | -1.85644500 |
| C | -4.31591300 | -0.47650900 | 0.83978500  |
| C | -3.82591000 | 0.11491500  | 2.00618600  |
| C | -5.66857000 | -0.79943400 | 0.75045200  |
| C | -4.68177300 | 0.38172100  | 3.06943400  |
| H | -2.77169200 | 0.36916700  | 2.06389900  |
| C | -6.52553300 | -0.53125400 | 1.81719600  |
| H | -6.06058800 | -1.25513500 | -0.15476000 |
| C | -6.03557500 | 0.05989900  | 2.97766100  |
| H | -4.29197300 | 0.84232400  | 3.97161600  |
| H | -7.57810900 | -0.78240100 | 1.73532700  |
| H | -6.70368400 | 0.27113200  | 3.80627700  |
| C | -0.52116900 | -2.56756000 | -0.40601300 |
| O | -1.26927600 | -3.16946000 | -1.20192600 |
| O | 0.22771200  | -3.31418000 | 0.50480800  |



|   |             |             |             |
|---|-------------|-------------|-------------|
| C | 0.04007600  | -4.71562200 | 0.42943900  |
| H | 0.29727300  | -5.10018700 | -0.56123700 |
| H | 0.70240400  | -5.15207000 | 1.17844400  |
| H | -0.99571200 | -4.99291400 | 0.64563000  |
| P | 2.20063900  | -0.27288200 | 0.47240600  |
| C | 2.23819900  | 0.79045700  | -1.00964900 |
| C | 3.58314500  | 1.42308800  | -1.41074100 |
| H | 1.50515200  | 1.58443200  | -0.81884400 |
| H | 1.81748000  | 0.16576300  | -1.80464300 |
| C | 3.83444600  | 2.77683500  | -0.74377600 |
| H | 4.42010800  | 0.74669400  | -1.20295600 |
| H | 3.58097900  | 1.56393200  | -2.49717500 |
| C | 5.23166000  | 3.30956600  | -1.04450800 |
| H | 3.07576500  | 3.48665300  | -1.09328200 |
| H | 3.70015900  | 2.69918300  | 0.34168400  |
| H | 5.38707400  | 4.29298700  | -0.59491600 |
| H | 5.99850800  | 2.63333000  | -0.65098600 |
| H | 5.39094500  | 3.40091600  | -2.12340300 |
| C | 2.97719600  | 0.56480400  | 1.89503900  |
| C | 4.50993800  | 0.58290800  | 1.92917700  |
| H | 2.59089000  | 0.05124400  | 2.78436800  |
| H | 2.56531900  | 1.58095300  | 1.92046500  |
| C | 5.03168900  | 1.47446100  | 3.05533700  |
| H | 4.88395100  | -0.43865800 | 2.06708000  |
| H | 4.91957900  | 0.94053800  | 0.97678600  |
| C | 6.55604800  | 1.49402500  | 3.11145600  |
| H | 4.65128700  | 2.49304700  | 2.90731000  |
| H | 4.62326700  | 1.12419100  | 4.01083200  |
| H | 6.91468800  | 2.13901500  | 3.91717800  |
| H | 6.95395600  | 0.48892600  | 3.28085900  |
| H | 6.97419200  | 1.86563900  | 2.17046600  |
| C | 3.01212800  | -1.88331800 | 0.21057600  |
| C | 4.34595400  | -1.92345400 | -0.55165100 |
| H | 2.25779400  | -2.50160800 | -0.28807900 |
| H | 3.11940300  | -2.29151500 | 1.22278300  |
| C | 4.18081300  | -1.93677800 | -2.07136100 |
| H | 5.00329500  | -1.10006800 | -0.25020400 |
| H | 4.86693800  | -2.83989200 | -0.25265700 |
| C | 5.52685600  | -1.91852100 | -2.78866300 |
| H | 3.61356400  | -2.83115900 | -2.35420400 |
| H | 3.58196400  | -1.08013100 | -2.40030100 |
| H | 5.40053400  | -1.96285100 | -3.87293500 |
| H | 6.08184900  | -1.00489700 | -2.55067000 |
| H | 6.14208400  | -2.77102200 | -2.48444500 |

|                 |             |             |             |
|-----------------|-------------|-------------|-------------|
| H               | -2.72428500 | -1.66184100 | 0.05331300  |
| <b>TS2 (SR)</b> |             |             |             |
| C               | -2.90312600 | -0.23331300 | -1.05302900 |
| C               | -2.89555800 | 0.17212400  | -2.43270300 |
| C               | 0.48647200  | -0.45505200 | -1.09474500 |
| C               | -0.55604800 | -0.70048700 | -0.02452000 |
| C               | -1.19952600 | 0.51384800  | 0.58463500  |
| N               | -2.47212900 | 0.78438000  | -0.14439900 |
| H               | 0.59059300  | -1.31041900 | -1.77034100 |
| H               | -1.40619400 | 0.34312000  | 1.64956600  |
| H               | -0.56542400 | 1.40792700  | 0.50557700  |
| N               | -2.84807100 | 0.47699000  | -3.55581700 |
| H               | 0.17717100  | 0.40120200  | -1.70526700 |
| C               | -3.27247400 | 1.84369100  | 0.24026300  |
| C               | -2.87150500 | 2.72335200  | 1.26649000  |
| C               | -4.51221800 | 2.08967100  | -0.38827100 |
| C               | -3.67403200 | 3.79984300  | 1.63301300  |
| H               | -1.93246400 | 2.57076100  | 1.78394700  |
| C               | -5.29852800 | 3.16895600  | -0.00820800 |
| H               | -4.85486700 | 1.42500100  | -1.17351700 |
| C               | -4.89211300 | 4.03866600  | 1.00392000  |
| H               | -3.33447500 | 4.45865100  | 2.42715800  |
| H               | -6.24703900 | 3.32952500  | -0.51267600 |
| H               | -5.51187600 | 4.87973800  | 1.29479000  |
| C               | -4.03039700 | -1.10684100 | -0.63339500 |
| C               | -4.22397600 | -1.36657500 | 0.73211100  |
| C               | -4.88383000 | -1.73171200 | -1.55453500 |
| C               | -5.23495900 | -2.22152300 | 1.15753400  |
| H               | -3.56075400 | -0.90347600 | 1.45738700  |
| C               | -5.89299200 | -2.58836300 | -1.12428300 |
| H               | -4.75602400 | -1.54034600 | -2.61687100 |
| C               | -6.07793400 | -2.83909800 | 0.23403200  |
| H               | -5.36545200 | -2.40775200 | 2.21966200  |
| H               | -6.54347300 | -3.05710100 | -1.85701000 |
| H               | -6.86744600 | -3.50414200 | 0.56836400  |
| C               | -0.38405400 | -1.84036600 | 0.85697600  |
| O               | -0.98689900 | -2.06777000 | 1.89605200  |
| O               | 0.53923100  | -2.71919800 | 0.37063500  |
| C               | 0.73390000  | -3.89940600 | 1.14535600  |
| H               | -0.17512100 | -4.50453500 | 1.16058300  |
| H               | 1.54179300  | -4.44584500 | 0.65956400  |
| H               | 1.00912000  | -3.64696300 | 2.17150200  |
| P               | 2.20525400  | -0.07525600 | -0.53264200 |

|   |              |              |              |
|---|--------------|--------------|--------------|
| C | 3. 17901800  | -1. 61517000 | -0. 40335200 |
| C | 4. 69340500  | -1. 47334500 | -0. 58235900 |
| H | 2. 76655400  | -2. 29683000 | -1. 15535000 |
| H | 2. 93540800  | -2. 05046700 | 0. 57147000  |
| C | 5. 38610900  | -2. 82786200 | -0. 42858100 |
| H | 4. 91845200  | -1. 06355300 | -1. 57466200 |
| H | 5. 10824900  | -0. 77535400 | 0. 15406800  |
| C | 6. 89628000  | -2. 72306900 | -0. 61905000 |
| H | 5. 16143900  | -3. 23320400 | 0. 56530700  |
| H | 4. 96445300  | -3. 53123500 | -1. 15638800 |
| H | 7. 37813500  | -3. 69686700 | -0. 50373900 |
| H | 7. 13750000  | -2. 34271100 | -1. 61637700 |
| H | 7. 33505900  | -2. 04014500 | 0. 11479800  |
| C | 2. 93726300  | 1. 03280400  | -1. 78601500 |
| C | 4. 12929800  | 1. 88413600  | -1. 33524200 |
| H | 2. 12150900  | 1. 68809300  | -2. 11179800 |
| H | 3. 20023400  | 0. 40311500  | -2. 64442200 |
| C | 4. 63920800  | 2. 76725000  | -2. 47452900 |
| H | 3. 82762500  | 2. 52187800  | -0. 49523900 |
| H | 4. 94780600  | 1. 24958200  | -0. 97808500 |
| C | 5. 80936300  | 3. 64295400  | -2. 03658800 |
| H | 4. 94182900  | 2. 13096000  | -3. 31451800 |
| H | 3. 81691700  | 3. 39563500  | -2. 83689600 |
| H | 6. 16325500  | 4. 26951800  | -2. 85875500 |
| H | 5. 51651200  | 4. 30086000  | -1. 21270200 |
| H | 6. 64858300  | 3. 02998600  | -1. 69392800 |
| C | 2. 15123900  | 0. 75066800  | 1. 09137600  |
| C | 3. 44741300  | 0. 69800800  | 1. 90863700  |
| H | 1. 34110000  | 0. 26132100  | 1. 64651300  |
| H | 1. 84023400  | 1. 78733900  | 0. 91488000  |
| C | 3. 27869800  | 1. 41717200  | 3. 24729300  |
| H | 3. 72694900  | -0. 34638000 | 2. 09327000  |
| H | 4. 27385100  | 1. 15763600  | 1. 35510700  |
| C | 4. 55151600  | 1. 36714200  | 4. 08713200  |
| H | 2. 99469300  | 2. 45955200  | 3. 06029100  |
| H | 2. 44833400  | 0. 95898900  | 3. 79750800  |
| H | 4. 41578500  | 1. 88257200  | 5. 04087700  |
| H | 4. 83719400  | 0. 33265600  | 4. 30067400  |
| H | 5. 38455500  | 1. 84361400  | 3. 56149900  |
| H | -1. 70183100 | -0. 92552900 | -0. 78436600 |

**TS2 (SS)**

|   |             |              |             |
|---|-------------|--------------|-------------|
| C | 3. 11290200 | -0. 80230200 | 0. 71838900 |
| C | 3. 89574800 | -1. 06991300 | 1. 89518400 |

|   |             |             |             |
|---|-------------|-------------|-------------|
| C | -0.26781300 | -0.97056500 | -0.09650300 |
| C | 0.56749100  | -0.32459000 | 0.98753400  |
| C | 1.33879900  | 0.92144100  | 0.64007300  |
| N | 2.78435300  | 0.57285600  | 0.52214500  |
| H | 0.22018900  | -0.84003800 | -1.06746500 |
| H | 0.99964000  | 1.34840900  | -0.31715200 |
| H | 1.21712600  | 1.68980100  | 1.41348100  |
| N | 4.49561300  | -1.31052700 | 2.86338500  |
| H | -0.37826500 | -2.04918400 | 0.06075100  |
| C | 3.69968000  | 1.52616400  | 0.12155000  |
| C | 3.31043200  | 2.86333900  | -0.09942900 |
| C | 5.05753900  | 1.19590400  | -0.07776800 |
| C | 4.24255400  | 3.81677700  | -0.49856600 |
| H | 2.28047100  | 3.16559200  | 0.04657400  |
| C | 5.97153600  | 2.16155100  | -0.47619600 |
| H | 5.38781400  | 0.17478300  | 0.07682000  |
| C | 5.57955000  | 3.48260700  | -0.69241400 |
| H | 3.90934000  | 4.83842200  | -0.65768800 |
| H | 7.00862400  | 1.87279800  | -0.62124000 |
| H | 6.29946300  | 4.23123100  | -1.00476200 |
| C | 3.44993000  | -1.60986000 | -0.48417100 |
| C | 3.05752800  | -1.16383600 | -1.75544300 |
| C | 4.10209200  | -2.84930600 | -0.39115200 |
| C | 3.29581000  | -1.93600500 | -2.88874700 |
| H | 2.57571800  | -0.19415400 | -1.85100000 |
| C | 4.34089900  | -3.61626600 | -1.52627700 |
| H | 4.42425400  | -3.21068100 | 0.58198400  |
| C | 3.93766000  | -3.16834600 | -2.78412000 |
| H | 2.98338900  | -1.56687100 | -3.86123100 |
| H | 4.84804400  | -4.57156100 | -1.42716500 |
| H | 4.12763300  | -3.76769600 | -3.66837400 |
| C | 0.06792400  | -0.37242700 | 2.34582700  |
| O | 0.54555600  | 0.19028300  | 3.31919400  |
| O | -1.03098700 | -1.18054200 | 2.46430600  |
| C | -1.56510400 | -1.30135100 | 3.78120200  |
| H | -1.85924200 | -0.32275700 | 4.16771900  |
| H | -2.43630500 | -1.95046500 | 3.69441800  |
| H | -0.82937200 | -1.74285900 | 4.45617300  |
| P | -1.99889500 | -0.34769500 | -0.29892800 |
| C | -2.24651600 | -0.00929900 | -2.07520800 |
| C | -3.69689700 | 0.04867300  | -2.56553000 |
| H | -1.71251400 | -0.81041000 | -2.60028100 |
| H | -1.71084100 | 0.92273800  | -2.29494100 |
| C | -3.76024800 | 0.34525000  | -4.06399000 |

|   |             |             |             |
|---|-------------|-------------|-------------|
| H | -4.18993800 | -0.91072200 | -2.36652300 |
| H | -4.26148400 | 0.81526500  | -2.02368200 |
| C | -5.19541000 | 0.38093400  | -4.58045300 |
| H | -3.26893700 | 1.30589500  | -4.25918700 |
| H | -3.18643600 | -0.41644000 | -4.60515300 |
| H | -5.22497700 | 0.59881600  | -5.65070300 |
| H | -5.69253200 | -0.58024300 | -4.41795900 |
| H | -5.77642000 | 1.15077600  | -4.06350900 |
| C | -3.16443400 | -1.64910600 | 0.22881300  |
| C | -4.54199000 | -1.16106600 | 0.68715500  |
| H | -2.65994800 | -2.17776600 | 1.04297400  |
| H | -3.25203100 | -2.34743900 | -0.61237600 |
| C | -5.41486800 | -2.32847900 | 1.14795900  |
| H | -4.42569800 | -0.45124900 | 1.51625100  |
| H | -5.05273100 | -0.62621100 | -0.12248400 |
| C | -6.79077900 | -1.86419000 | 1.61605900  |
| H | -5.52168500 | -3.04462500 | 0.32459400  |
| H | -4.90194700 | -2.85848100 | 1.95960300  |
| H | -7.40219400 | -2.70790700 | 1.94480300  |
| H | -6.70224300 | -1.16454500 | 2.45283000  |
| H | -7.32516300 | -1.35455300 | 0.80859700  |
| C | -2.21789600 | 1.18213200  | 0.67018600  |
| C | -3.32040600 | 2.13341900  | 0.19388700  |
| H | -1.24759900 | 1.69213500  | 0.64123800  |
| H | -2.38344900 | 0.87468700  | 1.70903000  |
| C | -3.39114300 | 3.37614400  | 1.08161900  |
| H | -3.12378500 | 2.44126600  | -0.84026600 |
| H | -4.29467300 | 1.63100700  | 0.20041000  |
| C | -4.46876100 | 4.35017000  | 0.61479400  |
| H | -3.58747000 | 3.06785200  | 2.11539000  |
| H | -2.41298800 | 3.87182600  | 1.08252400  |
| H | -4.50678600 | 5.23433200  | 1.25549800  |
| H | -4.27534200 | 4.68373100  | -0.40934500 |
| H | -5.45574100 | 3.87779800  | 0.63249300  |
| H | 1.76928900  | -1.04671300 | 1.02996600  |

**TS2 (R)**

|   |             |             |             |
|---|-------------|-------------|-------------|
| C | 3.51873000  | -0.17044100 | -0.73180500 |
| C | -0.72497600 | 0.15311700  | -1.20771700 |
| C | 0.35576700  | -0.72496300 | -0.60908300 |
| C | 1.33745600  | -0.13898200 | 0.37512300  |
| N | 2.43982000  | 0.61751900  | -0.21516900 |
| H | -0.92342600 | -0.08916800 | -2.25822800 |
| H | 0.81058000  | 0.50389100  | 1.08329500  |

|   |              |              |              |
|---|--------------|--------------|--------------|
| H | 1. 76467400  | -0. 94140800 | 0. 98202500  |
| H | -0. 41440900 | 1. 20473000  | -1. 18606900 |
| C | 2. 54585700  | 1. 99935800  | -0. 09075500 |
| C | 1. 46502300  | 2. 81623700  | 0. 30050000  |
| C | 3. 76563500  | 2. 64447100  | -0. 38631000 |
| C | 1. 60644100  | 4. 19682000  | 0. 40088100  |
| H | 0. 49445800  | 2. 38615000  | 0. 51899800  |
| C | 3. 88954800  | 4. 02363800  | -0. 28486200 |
| H | 4. 61769500  | 2. 04658100  | -0. 68746300 |
| C | 2. 81588800  | 4. 82053300  | 0. 11092700  |
| H | 0. 74693300  | 4. 78796000  | 0. 70330100  |
| H | 4. 84744000  | 4. 48079600  | -0. 51644900 |
| H | 2. 91916700  | 5. 89734500  | 0. 18657600  |
| C | 0. 40155200  | -1. 95649300 | -1. 14601000 |
| O | -0. 06000300 | -2. 83080500 | -1. 79171700 |
| O | 2. 23632700  | -2. 63037200 | -0. 70485500 |
| C | 2. 51946200  | -3. 43238100 | 0. 43111400  |
| H | 2. 52961900  | -2. 84577700 | 1. 35682500  |
| H | 1. 74353600  | -4. 19804900 | 0. 50204600  |
| H | 3. 49242700  | -3. 91966200 | 0. 31392700  |
| H | 2. 81797600  | -1. 79741600 | -0. 73437300 |
| C | 3. 76017400  | -0. 06784300 | -2. 11887100 |
| N | 3. 95224100  | -0. 01158100 | -3. 27206100 |
| C | 4. 60747100  | -0. 56194100 | 0. 16103200  |
| C | 4. 54265800  | -0. 29754200 | 1. 54440600  |
| C | 5. 72768500  | -1. 28294300 | -0. 30711100 |
| C | 5. 54091800  | -0. 73871000 | 2. 40829400  |
| H | 3. 70230000  | 0. 27116800  | 1. 93342800  |
| C | 6. 72065400  | -1. 71410100 | 0. 56172800  |
| H | 5. 80647000  | -1. 50241300 | -1. 36921000 |
| C | 6. 63871000  | -1. 45178700 | 1. 93114900  |
| H | 5. 45983500  | -0. 51533900 | 3. 46875900  |
| H | 7. 57003400  | -2. 26412700 | 0. 16545600  |
| H | 7. 41450100  | -1. 79412800 | 2. 60771200  |
| P | -2. 35988700 | 0. 04894600  | -0. 37754900 |
| C | -2. 97752800 | -1. 63344100 | -0. 70013300 |
| C | -4. 13308000 | -2. 14837900 | 0. 16032200  |
| H | -2. 10716800 | -2. 28896400 | -0. 58262400 |
| H | -3. 24036300 | -1. 64971900 | -1. 76567900 |
| C | -4. 53055400 | -3. 56560600 | -0. 25350300 |
| H | -3. 83636100 | -2. 15027700 | 1. 21581700  |
| H | -5. 00540200 | -1. 49164900 | 0. 07201100  |
| C | -5. 65929900 | -4. 11560800 | 0. 61310200  |
| H | -4. 83561400 | -3. 55900900 | -1. 30652400 |

|   |             |             |             |
|---|-------------|-------------|-------------|
| H | -3.65298800 | -4.21940800 | -0.18543200 |
| H | -5.94024700 | -5.12480900 | 0.30292300  |
| H | -5.35839400 | -4.15693600 | 1.66438400  |
| H | -6.54848500 | -3.48146600 | 0.54433600  |
| C | -2.11943100 | 0.41262400  | 1.40118800  |
| C | -3.23212900 | 1.17781200  | 2.13660900  |
| H | -1.21071900 | 1.02184100  | 1.41916900  |
| H | -1.87561500 | -0.53038800 | 1.90363800  |
| C | -4.41298900 | 0.33857400  | 2.61599700  |
| H | -3.58762000 | 2.01122000  | 1.51777300  |
| H | -2.76347300 | 1.64130900  | 3.01147300  |
| C | -5.44255300 | 1.19457700  | 3.34834800  |
| H | -4.89829500 | -0.16369000 | 1.77321200  |
| H | -4.04302000 | -0.45570300 | 3.27562700  |
| H | -6.27150300 | 0.58686200  | 3.71792600  |
| H | -4.98873900 | 1.70622900  | 4.20244600  |
| H | -5.85552400 | 1.95862600  | 2.68111800  |
| C | -3.41067700 | 1.31048000  | -1.16542200 |
| C | -4.92522600 | 1.15599800  | -0.99308700 |
| H | -3.15030900 | 1.28065900  | -2.23041100 |
| H | -3.06535300 | 2.27919400  | -0.78414600 |
| C | -5.67468200 | 2.31083600  | -1.65794800 |
| H | -5.25258000 | 0.20884600  | -1.43815900 |
| H | -5.19394500 | 1.12214600  | 0.06940200  |
| C | -7.18509400 | 2.18253700  | -1.48656000 |
| H | -5.32823800 | 3.25727000  | -1.22605700 |
| H | -5.41805500 | 2.33900900  | -2.72349900 |
| H | -7.70939700 | 3.00866400  | -1.97253400 |
| H | -7.54970000 | 1.24771000  | -1.92302800 |
| H | -7.45787100 | 2.18623600  | -0.42655700 |

**TS2 (S)**

|   |             |             |             |
|---|-------------|-------------|-------------|
| C | -3.66602400 | -0.33168500 | -0.80372500 |
| C | 0.38120800  | 0.02595100  | 0.77896400  |
| C | -0.49934900 | -0.78604800 | -0.15421500 |
| C | -1.25777900 | -0.10345400 | -1.27125100 |
| N | -2.51694200 | 0.52583100  | -0.88641300 |
| H | 0.34991600  | -0.34692900 | 1.80941300  |
| H | -0.61647900 | 0.64507200  | -1.73992800 |
| H | -1.47440200 | -0.82772400 | -2.05721700 |
| H | 0.04042100  | 1.06707600  | 0.81618200  |
| C | -2.62425600 | 1.89474300  | -0.66288400 |
| C | -1.51479000 | 2.76654800  | -0.67436700 |
| C | -3.88751000 | 2.47155000  | -0.40583200 |

|   |             |             |             |
|---|-------------|-------------|-------------|
| C | -1.66783000 | 4.13230800  | -0.45400700 |
| H | -0.51429200 | 2.39463300  | -0.85873200 |
| C | -4.02256100 | 3.83555800  | -0.18531300 |
| H | -4.76326000 | 1.83479500  | -0.38178500 |
| C | -2.91882600 | 4.68740700  | -0.20657100 |
| H | -0.78482100 | 4.76433400  | -0.47515000 |
| H | -5.01359000 | 4.23741400  | 0.00600100  |
| H | -3.03201800 | 5.75157700  | -0.03192400 |
| C | -0.61821000 | -2.06730900 | 0.22348900  |
| O | -0.32252000 | -3.02572300 | 0.84091000  |
| O | -2.28504400 | -2.73931800 | -0.80226000 |
| C | -2.10150900 | -3.44015400 | -2.01874400 |
| H | -1.85042100 | -2.77006600 | -2.85032800 |
| H | -1.27767100 | -4.14384600 | -1.87601300 |
| H | -3.00251900 | -4.00371700 | -2.28138400 |
| H | -2.90698600 | -1.94535800 | -0.91174800 |
| C | -4.49832500 | -0.33737800 | -1.94944600 |
| N | -5.16368400 | -0.38743800 | -2.91102500 |
| C | -4.26626600 | -0.59734800 | 0.50275500  |
| C | -3.57579800 | -0.29970300 | 1.69484500  |
| C | -5.53762100 | -1.19639900 | 0.62736500  |
| C | -4.12429400 | -0.59684100 | 2.93794500  |
| H | -2.59678400 | 0.16725600  | 1.62964000  |
| C | -6.07757100 | -1.49089000 | 1.87270400  |
| H | -6.09994200 | -1.43245800 | -0.27265500 |
| C | -5.37846500 | -1.19685900 | 3.04423100  |
| H | -3.56347000 | -0.35217000 | 3.83613800  |
| H | -7.05924900 | -1.95361300 | 1.92980600  |
| H | -5.80353100 | -1.42579200 | 4.01582900  |
| P | 2.16111900  | 0.04683500  | 0.32313000  |
| C | 2.76324400  | -1.64871200 | 0.60406500  |
| C | 4.08269900  | -2.06138100 | -0.05111800 |
| H | 1.95652900  | -2.30202700 | 0.25246500  |
| H | 2.81133600  | -1.76639700 | 1.69421100  |
| C | 4.41373500  | -3.51981000 | 0.26716800  |
| H | 4.01282400  | -1.93536200 | -1.13797600 |
| H | 4.90329900  | -1.42423600 | 0.29637500  |
| C | 5.71647900  | -3.96488200 | -0.39029300 |
| H | 4.48182400  | -3.64237100 | 1.35453700  |
| H | 3.58745300  | -4.15719200 | -0.06922100 |
| H | 5.94420800  | -5.00621400 | -0.15063500 |
| H | 5.65394900  | -3.87518900 | -1.47910500 |
| H | 6.55509600  | -3.34923500 | -0.05106200 |
| C | 2.28868300  | 0.59575000  | -1.41879600 |



|   |            |             |             |
|---|------------|-------------|-------------|
| C | 3.50627900 | 1.44202900  | -1.82591400 |
| H | 1.38808600 | 1.20100700  | -1.56058300 |
| H | 2.17725800 | -0.28865600 | -2.05632800 |
| C | 4.78572300 | 0.66997700  | -2.13538700 |
| H | 3.70146500 | 2.20881000  | -1.06581300 |
| H | 3.21225600 | 1.99111100  | -2.72687000 |
| C | 5.91202100 | 1.60934300  | -2.55727700 |
| H | 5.10902400 | 0.09070400  | -1.26478800 |
| H | 4.58180100 | -0.05785700 | -2.93007800 |
| H | 6.81964200 | 1.05384300  | -2.80343300 |
| H | 5.62395400 | 2.19575100  | -3.43496500 |
| H | 6.15304800 | 2.31048500  | -1.75119400 |
| C | 2.97296500 | 1.24008900  | 1.43303500  |
| C | 4.49525400 | 1.12118300  | 1.56240800  |
| H | 2.50138800 | 1.10410000  | 2.41347700  |
| H | 2.68143500 | 2.23616300  | 1.07756900  |
| C | 5.06141400 | 2.22632900  | 2.45385200  |
| H | 4.75171900 | 0.14363800  | 1.98763900  |
| H | 4.97471900 | 1.17897200  | 0.57812900  |
| C | 6.57703500 | 2.12357700  | 2.59436400  |
| H | 4.79111900 | 3.20041100  | 2.02888800  |
| H | 4.58727400 | 2.17074000  | 3.44084200  |
| H | 6.96900100 | 2.91803800  | 3.23373100  |
| H | 6.86452700 | 1.16365000  | 3.03393000  |
| H | 7.06445600 | 2.20494100  | 1.61770700  |

TS3'(RR)

|   |            |             |             |
|---|------------|-------------|-------------|
| C | 2.48562700 | 0.46276300  | 0.84409100  |
| C | 2.42846600 | 0.66658700  | 2.25529800  |
| C | 0.44130900 | -0.19273400 | 0.41206400  |
| C | 0.92413900 | -1.62137700 | 0.63380800  |
| C | 2.28549400 | -1.79798200 | -0.04629100 |
| N | 3.14849600 | -0.73571900 | 0.43685700  |
| H | 0.58404600 | 0.26880300  | -0.55835400 |
| H | 2.16238400 | -1.77206000 | -1.13983800 |
| H | 2.70161900 | -2.77736400 | 0.21544700  |
| N | 2.27870000 | 0.80598400  | 3.40365700  |
| H | 0.15935700 | 0.44200900  | 1.24442900  |
| C | 4.52049800 | -0.78623400 | 0.21270200  |
| C | 5.36491400 | 0.22230700  | 0.71613100  |
| C | 5.10513100 | -1.83665400 | -0.51848900 |
| C | 6.73636100 | 0.16340700  | 0.51013300  |
| H | 4.93505000 | 1.05103100  | 1.26798100  |
| C | 6.48330400 | -1.88035800 | -0.71333700 |

|   |             |             |             |
|---|-------------|-------------|-------------|
| H | 4.48833400  | -2.61690800 | -0.94874100 |
| C | 7.31355000  | -0.88776200 | -0.20273100 |
| H | 7.36262900  | 0.95361600  | 0.91370900  |
| H | 6.90630700  | -2.70414100 | -1.28088400 |
| H | 8.38573800  | -0.92667200 | -0.36061600 |
| C | 2.52782800  | 1.65654000  | -0.00928700 |
| C | 2.94304800  | 1.56507200  | -1.34946400 |
| C | 2.03909100  | 2.89474200  | 0.44635300  |
| C | 2.88230400  | 2.67094400  | -2.19151100 |
| H | 3.32098700  | 0.61839000  | -1.72564100 |
| C | 1.97625500  | 3.99447100  | -0.40310200 |
| H | 1.71059200  | 2.99074200  | 1.47828400  |
| C | 2.39979200  | 3.89402100  | -1.72787000 |
| H | 3.21718400  | 2.57490400  | -3.22022300 |
| H | 1.59509100  | 4.93844900  | -0.02452200 |
| H | 2.35454900  | 4.75418900  | -2.38731200 |
| C | -0.06273600 | -2.68585300 | 0.18019600  |
| O | -0.89623100 | -3.18801600 | 0.90152900  |
| O | 0.08981100  | -3.01590600 | -1.10462000 |
| C | -0.70699000 | -4.11535300 | -1.57011000 |
| H | -0.47566100 | -5.01057700 | -0.99095200 |
| H | -0.43537900 | -4.25238300 | -2.61420900 |
| H | -1.76947800 | -3.88776700 | -1.47786800 |
| P | -1.83988400 | -0.23947300 | 0.03731000  |
| C | -2.83418200 | -1.30114800 | -1.09745900 |
| C | -4.12832700 | -0.71622400 | -1.67044800 |
| H | -2.16270700 | -1.57573700 | -1.92036700 |
| H | -3.03536100 | -2.22101300 | -0.53386600 |
| C | -4.84594000 | -1.72157100 | -2.57158700 |
| H | -3.89875900 | 0.18761600  | -2.24868700 |
| H | -4.80070900 | -0.41021300 | -0.86093000 |
| C | -6.12350100 | -1.14453700 | -3.17474200 |
| H | -5.08088100 | -2.62077600 | -1.98891900 |
| H | -4.16473300 | -2.03775000 | -3.37133200 |
| H | -6.62637800 | -1.87320800 | -3.81545400 |
| H | -5.90271900 | -0.25937600 | -3.77934200 |
| H | -6.82432200 | -0.84582600 | -2.38896500 |
| C | -1.97587800 | 1.49420800  | -0.56378400 |
| C | -3.19478400 | 2.32772400  | -0.16152700 |
| H | -1.06444100 | 2.00068100  | -0.21278500 |
| H | -1.88714500 | 1.44214600  | -1.65677100 |
| C | -3.09592600 | 3.75571100  | -0.69941200 |
| H | -3.27544800 | 2.36061100  | 0.93254600  |
| H | -4.11643800 | 1.86481100  | -0.53302200 |

|   |             |             |             |
|---|-------------|-------------|-------------|
| C | -4.29155700 | 4.61203600  | -0.29226000 |
| H | -3.01644000 | 3.72159100  | -1.79290200 |
| H | -2.16704200 | 4.21178700  | -0.33454000 |
| H | -4.20559000 | 5.62842600  | -0.68456500 |
| H | -4.37167400 | 4.67672000  | 0.79735200  |
| H | -5.22478900 | 4.18314500  | -0.67039000 |
| C | -2.60281000 | -0.34084900 | 1.71047400  |
| C | -4.12737500 | -0.44049800 | 1.80790100  |
| H | -2.14664800 | -1.22534300 | 2.17256500  |
| H | -2.23621600 | 0.52970500  | 2.26987900  |
| C | -4.59435800 | -0.54050100 | 3.26052200  |
| H | -4.47354700 | -1.32635100 | 1.25978300  |
| H | -4.60206200 | 0.42782900  | 1.33593300  |
| C | -6.11065400 | -0.67215300 | 3.37007100  |
| H | -4.25618200 | 0.34762100  | 3.80827500  |
| H | -4.10925600 | -1.40230000 | 3.73482200  |
| H | -6.43071200 | -0.74332100 | 4.41261100  |
| H | -6.46169000 | -1.56749900 | 2.84754700  |
| H | -6.61038000 | 0.19265700  | 2.92253600  |
| H | 1.03561700  | -1.77175000 | 1.71179700  |

TS3'(SR)

|   |             |             |             |
|---|-------------|-------------|-------------|
| C | 2.60466800  | 0.70834600  | -0.34249800 |
| C | 0.49957000  | -0.03276700 | -0.22661400 |
| C | 1.06595400  | -1.23616900 | 0.51390900  |
| C | 2.36630000  | -1.69924300 | -0.15141000 |
| N | 3.25628300  | -0.55745400 | -0.21198200 |
| H | 0.34656000  | 0.90964400  | 0.28090200  |
| H | 2.13328400  | -2.11186300 | -1.14649400 |
| H | 2.81446100  | -2.50252600 | 0.44461400  |
| H | 0.46013200  | -0.05288200 | -1.31087100 |
| C | 4.59021700  | -0.73149100 | -0.58034000 |
| C | 5.11684100  | -2.00373800 | -0.86426200 |
| C | 5.45338400  | 0.37831200  | -0.66241300 |
| C | 6.46091500  | -2.15383900 | -1.19683900 |
| H | 4.48190200  | -2.88134100 | -0.84099200 |
| C | 6.78988900  | 0.21059900  | -0.99813900 |
| H | 5.06724800  | 1.36964700  | -0.45112900 |
| C | 7.31130900  | -1.05512400 | -1.26676500 |
| H | 6.83912700  | -3.14892700 | -1.41202200 |
| H | 7.43213100  | 1.08493500  | -1.04787600 |
| H | 8.35625300  | -1.17921100 | -1.52917900 |
| C | 0.11791500  | -2.41905200 | 0.52675900  |
| O | -0.14988100 | -3.09193200 | -0.44336700 |

|   |             |             |             |
|---|-------------|-------------|-------------|
| O | -0.38616800 | -2.64598300 | 1.74335800  |
| C | -1.32487700 | -3.72655000 | 1.83267900  |
| H | -2.21769800 | -3.49693300 | 1.24468200  |
| H | -1.57808300 | -3.81112600 | 2.88705000  |
| H | -0.87651800 | -4.64970900 | 1.46394600  |
| H | 1.26863100  | -0.94022400 | 1.54676000  |
| P | -1.83361600 | -0.21880900 | -0.22872300 |
| C | -2.66514600 | -0.28600000 | 1.42373200  |
| C | -4.15075300 | -0.63999400 | 1.49623500  |
| H | -2.08585400 | -0.99854300 | 2.02090400  |
| H | -2.48202900 | 0.69887100  | 1.87313500  |
| C | -4.62438200 | -0.78447200 | 2.94320400  |
| H | -4.33935700 | -1.58005200 | 0.96171200  |
| H | -4.74795300 | 0.13176300  | 0.99760000  |
| C | -6.10515800 | -1.14147300 | 3.03068000  |
| H | -4.43360800 | 0.15325400  | 3.47922500  |
| H | -4.02323700 | -1.55605700 | 3.44054200  |
| H | -6.43135700 | -1.23573400 | 4.06948000  |
| H | -6.30737900 | -2.09163300 | 2.52657000  |
| H | -6.72072400 | -0.37264400 | 2.55331200  |
| C | -2.54649100 | -1.45750900 | -1.41378200 |
| C | -3.62980100 | -1.03239500 | -2.41720400 |
| H | -1.66328600 | -1.81020100 | -1.95695400 |
| H | -2.87961100 | -2.31808700 | -0.82173700 |
| C | -5.06508600 | -1.12262100 | -1.90425100 |
| H | -3.43083400 | -0.02058900 | -2.79218600 |
| H | -3.53988300 | -1.68953300 | -3.29061400 |
| C | -6.06806600 | -0.61644200 | -2.93695200 |
| H | -5.17554100 | -0.54876100 | -0.97909800 |
| H | -5.28462800 | -2.16533000 | -1.64321300 |
| H | -7.09609800 | -0.72960600 | -2.58477500 |
| H | -5.97018100 | -1.16475800 | -3.87916300 |
| H | -5.89953800 | 0.44466700  | -3.15215300 |
| C | -2.15067900 | 1.46191300  | -0.91093700 |
| C | -3.56502700 | 2.03193700  | -0.78732800 |
| H | -1.44333800 | 2.12974500  | -0.40076000 |
| H | -1.83216800 | 1.43326100  | -1.96108900 |
| C | -3.70423700 | 3.38376800  | -1.48780700 |
| H | -3.81878900 | 2.14895900  | 0.27386800  |
| H | -4.29888700 | 1.33772000  | -1.21167600 |
| C | -5.11087800 | 3.95693600  | -1.34118100 |
| H | -3.46031200 | 3.26241500  | -2.55027200 |
| H | -2.96768800 | 4.08375000  | -1.07486300 |
| H | -5.20543500 | 4.92198600  | -1.84508800 |

|   |             |            |             |
|---|-------------|------------|-------------|
| H | -5.36466200 | 4.10027000 | -0.28632700 |
| H | -5.85272900 | 3.27727200 | -1.77321400 |
| C | 2.66199800  | 1.64903400 | 0.78168300  |
| C | 3.16460100  | 1.24534500 | 2.03150000  |
| C | 2.12968700  | 2.94837300 | 0.67396800  |
| C | 3.14142400  | 2.10877000 | 3.12184700  |
| H | 3.58258500  | 0.24782500 | 2.12957400  |
| C | 2.10919100  | 3.80490300 | 1.76920200  |
| H | 1.73627500  | 3.28430200 | -0.28254300 |
| C | 2.61381900  | 3.39398200 | 3.00270900  |
| H | 3.54178800  | 1.77314900 | 4.07413800  |
| H | 1.69442400  | 4.80238500 | 1.65687700  |
| H | 2.59678600  | 4.06382700 | 3.85587200  |
| C | 2.56683400  | 1.26424800 | -1.65274500 |
| N | 2.53583800  | 1.71981800 | -2.72593200 |

TS3'(RS)

|   |             |             |             |
|---|-------------|-------------|-------------|
| C | -2.35054300 | 0.41940300  | -0.26377100 |
| C | -2.28907200 | 0.65172600  | -1.66683600 |
| C | -0.23821200 | -0.21117600 | 0.00034800  |
| C | -0.74669900 | -1.28930500 | 0.94162500  |
| C | -2.04600600 | -1.89159700 | 0.38591800  |
| N | -2.97245300 | -0.79670600 | 0.15989400  |
| H | -0.19037000 | -0.43372300 | -1.06053000 |
| H | -1.82639400 | -2.44959300 | -0.53904400 |
| H | -2.46096300 | -2.59758200 | 1.11284500  |
| N | -2.14095900 | 0.82730900  | -2.81166100 |
| H | -0.14618300 | 0.81435300  | 0.32891100  |
| C | -4.30036600 | -1.07769800 | -0.17236900 |
| C | -4.78982700 | -2.39408700 | -0.21277300 |
| C | -5.19058600 | -0.02761500 | -0.46536400 |
| C | -6.12724800 | -2.64031900 | -0.51810000 |
| H | -4.13254500 | -3.23334200 | -0.01905700 |
| C | -6.51878500 | -0.29113500 | -0.77122400 |
| H | -4.83065300 | 0.99584700  | -0.44367200 |
| C | -7.00396200 | -1.59836900 | -0.79845100 |
| H | -6.47671400 | -3.66859500 | -0.54325200 |
| H | -7.18339500 | 0.54026800  | -0.98916900 |
| H | -8.04226900 | -1.79879800 | -1.03943500 |
| C | -2.41115200 | 1.59391400  | 0.61052200  |
| C | -2.91572600 | 1.49831700  | 1.91926500  |
| C | -1.85998400 | 2.82575500  | 0.20493500  |
| C | -2.88197000 | 2.59228400  | 2.77791800  |
| H | -3.34286200 | 0.55403200  | 2.24478100  |

|   |             |             |             |
|---|-------------|-------------|-------------|
| C | -1.82761900 | 3.91390700  | 1.07016200  |
| H | -1.46454700 | 2.92701000  | -0.80377400 |
| C | -2.33805300 | 3.80802700  | 2.36428400  |
| H | -3.28733900 | 2.49355600  | 3.78004000  |
| H | -1.40135700 | 4.85321200  | 0.72887300  |
| H | -2.31328600 | 4.65803500  | 3.03623100  |
| C | 0.25491700  | -2.40058000 | 1.18263600  |
| O | 0.73463300  | -2.67833200 | 2.25657700  |
| O | 0.54529200  | -3.06058300 | 0.05390300  |
| C | 1.45664800  | -4.15814400 | 0.19908500  |
| H | 1.04082600  | -4.90333900 | 0.88011800  |
| H | 1.58125600  | -4.57471500 | -0.79753600 |
| H | 2.41394000  | -3.80810700 | 0.59195200  |
| P | 2.07816500  | -0.21470100 | 0.06435800  |
| C | 3.12058200  | -0.61560600 | 1.54010800  |
| C | 4.30686200  | 0.31196300  | 1.82152000  |
| H | 3.46256800  | -1.64981200 | 1.39805200  |
| H | 2.44913400  | -0.63738900 | 2.40551700  |
| C | 5.13417700  | -0.18069700 | 3.00851000  |
| H | 4.95240100  | 0.39205900  | 0.93736800  |
| H | 3.94016800  | 1.32328200  | 2.03359600  |
| C | 6.30504600  | 0.74813400  | 3.31889200  |
| H | 4.48300000  | -0.26681500 | 3.88801000  |
| H | 5.50520100  | -1.19070700 | 2.79529000  |
| H | 6.88567000  | 0.38765800  | 4.17063000  |
| H | 6.97933400  | 0.82493800  | 2.45909200  |
| H | 5.94975900  | 1.75730500  | 3.55566800  |
| C | 2.86006000  | -1.03058600 | -1.38785100 |
| C | 4.32695300  | -0.68841200 | -1.65465600 |
| H | 2.24112500  | -0.76806600 | -2.25482600 |
| H | 2.73686100  | -2.11069900 | -1.24476000 |
| C | 4.83966900  | -1.33288500 | -2.94264700 |
| H | 4.45324900  | 0.40048500  | -1.72196500 |
| H | 4.94344500  | -1.02760400 | -0.81205200 |
| C | 6.30348200  | -0.99711200 | -3.21277600 |
| H | 4.71236500  | -2.42021100 | -2.87509100 |
| H | 4.21862200  | -0.99707900 | -3.78261000 |
| H | 6.65575000  | -1.46270000 | -4.13628300 |
| H | 6.44316200  | 0.08442100  | -3.30567300 |
| H | 6.94106900  | -1.34591100 | -2.39370100 |
| C | 2.25948200  | 1.59353700  | -0.22785300 |
| C | 1.64302800  | 2.04596200  | -1.55838600 |
| H | 3.31126100  | 1.89409600  | -0.17727200 |
| H | 1.74675800  | 2.08837600  | 0.60885500  |

|   |             |             |             |
|---|-------------|-------------|-------------|
| C | 1.49936100  | 3.56527000  | -1.63642500 |
| H | 2.26609500  | 1.69387200  | -2.39069100 |
| H | 0.65124000  | 1.59985000  | -1.70833900 |
| C | 0.86075600  | 4.01080600  | -2.94854300 |
| H | 0.88613200  | 3.90341600  | -0.79028200 |
| H | 2.48349400  | 4.03282100  | -1.51509100 |
| H | 0.73674300  | 5.09581600  | -2.98496900 |
| H | 1.47462000  | 3.71146500  | -3.80324300 |
| H | -0.12713300 | 3.55263600  | -3.07398700 |
| H | -0.94850200 | -0.83847600 | 1.91742700  |

TS3'(SS)

|   |            |             |             |
|---|------------|-------------|-------------|
| C | 2.37382400 | 0.06065700  | -0.98210200 |
| C | 2.41357000 | -0.06559000 | -2.40191400 |
| C | 0.26783800 | -0.41034700 | -0.53939500 |
| C | 0.69490000 | -1.87066900 | -0.47913500 |
| C | 1.99848400 | -1.97409300 | 0.32181000  |
| N | 2.93976300 | -1.03465300 | -0.26156800 |
| H | 0.41780600 | 0.21289100  | 0.33548200  |
| H | 1.79903100 | -1.76028800 | 1.38338200  |
| H | 2.38882300 | -2.99662400 | 0.25753500  |
| N | 2.34110700 | -0.19350400 | -3.55932500 |
| H | 0.05485500 | 0.07096100  | -1.48524900 |
| C | 4.28640000 | -1.08697400 | 0.07987000  |
| C | 4.75994900 | -1.99310200 | 1.04703300  |
| C | 5.21661200 | -0.22675500 | -0.53556100 |
| C | 6.11497800 | -2.04477500 | 1.36321600  |
| H | 4.07384500 | -2.65312000 | 1.56490400  |
| C | 6.56347000 | -0.29114500 | -0.20574100 |
| H | 4.87242100 | 0.48963500  | -1.27331800 |
| C | 7.03078100 | -1.20071800 | 0.74339300  |
| H | 6.45159600 | -2.75487600 | 2.11292200  |
| H | 7.25768300 | 0.38252500  | -0.69957200 |
| H | 8.08438900 | -1.24412500 | 0.99671400  |
| C | 2.41682800 | 1.41407800  | -0.41881400 |
| C | 2.67317300 | 1.60505800  | 0.95060200  |
| C | 2.09305300 | 2.54347000  | -1.19374100 |
| C | 2.61688700 | 2.87447900  | 1.51696900  |
| H | 2.92512700 | 0.74607100  | 1.56678200  |
| C | 2.03727700 | 3.80879100  | -0.62009600 |
| H | 1.88760300 | 2.42288800  | -2.25445200 |
| C | 2.30134300 | 3.98683300  | 0.73862200  |
| H | 2.82529600 | 2.99527000  | 2.57600300  |
| H | 1.78221200 | 4.66439800  | -1.23961100 |

|   |             |             |             |
|---|-------------|-------------|-------------|
| H | 2.25969400  | 4.97678600  | 1.18136300  |
| C | -0.34533100 | -2.81491800 | 0.09524300  |
| O | -0.96537700 | -3.62541700 | -0.55277700 |
| O | -0.49400600 | -2.66323200 | 1.41766300  |
| C | -1.41461400 | -3.56870700 | 2.04191100  |
| H | -1.07285700 | -4.59681100 | 1.91271000  |
| H | -1.42889500 | -3.29717900 | 3.09523600  |
| H | -2.40961600 | -3.46351800 | 1.60372100  |
| P | -2.01807900 | -0.28315300 | -0.16569800 |
| C | -3.20135900 | -1.42580300 | -1.01705800 |
| C | -4.44248200 | -0.79566400 | -1.65549700 |
| H | -3.48943300 | -2.17417700 | -0.26725200 |
| H | -2.62621100 | -1.96875100 | -1.77486200 |
| C | -5.38760600 | -1.86126500 | -2.21136900 |
| H | -4.98325000 | -0.17840900 | -0.92773500 |
| H | -4.13596200 | -0.12598700 | -2.46808200 |
| C | -6.60900600 | -1.25024900 | -2.89222000 |
| H | -4.83993700 | -2.49190400 | -2.92222400 |
| H | -5.70604900 | -2.51879000 | -1.39317200 |
| H | -7.28033100 | -2.02314200 | -3.27468300 |
| H | -7.17552600 | -0.62887600 | -2.19165900 |
| H | -6.30992000 | -0.61726900 | -3.73332800 |
| C | -2.60707500 | -0.10115100 | 1.57018300  |
| C | -4.06073500 | 0.34230500  | 1.74580900  |
| H | -1.92413100 | 0.61096800  | 2.05009700  |
| H | -2.43766600 | -1.06326600 | 2.06500600  |
| C | -4.42097700 | 0.54733300  | 3.21746700  |
| H | -4.24085400 | 1.27677100  | 1.19749500  |
| H | -4.72944000 | -0.41180000 | 1.31197000  |
| C | -5.87133900 | 0.98417400  | 3.40138100  |
| H | -4.23935700 | -0.38595700 | 3.76438600  |
| H | -3.74717600 | 1.29775400  | 3.64869500  |
| H | -6.11289000 | 1.12874500  | 4.45733300  |
| H | -6.06311300 | 1.92720500  | 2.88003000  |
| H | -6.55873500 | 0.23432200  | 2.99781900  |
| C | -2.25892200 | 1.37879100  | -0.92200400 |
| C | -1.63338600 | 2.51535000  | -0.10325800 |
| H | -3.32669000 | 1.57192400  | -1.06674600 |
| H | -1.80852500 | 1.33960600  | -1.92295200 |
| C | -1.67362200 | 3.84358800  | -0.85984600 |
| H | -2.17952600 | 2.62112600  | 0.84325000  |
| H | -0.58843300 | 2.29222200  | 0.15651800  |
| C | -1.30802700 | 5.02747800  | 0.03026600  |
| H | -0.98285800 | 3.78445400  | -1.71040900 |



|   |             |             |             |
|---|-------------|-------------|-------------|
| H | -2.67653900 | 3.99125200  | -1.27936000 |
| H | -1.27968200 | 5.96043200  | -0.53896700 |
| H | -2.03959200 | 5.14585800  | 0.83580900  |
| H | -0.32518700 | 4.87776200  | 0.48677100  |
| H | 0.86884500  | -2.21552900 | -1.50181900 |
